1           **The chromatin remodeler Ino80 mediates alternative RNAPII pausing site determination**

2

3

4                           Youngseo Cheon<sup>1</sup>, Sungwook Han<sup>1</sup>, Taemook Kim<sup>1</sup>, Daeyoup Lee<sup>1,2,\*</sup>

5

6           <sup>1</sup>Department of Biological Sciences, Korea Advanced Institute of Science and Technology, Daejeon

7           34141, South Korea.

8           <sup>2</sup>Lead contact

9

10          \*To whom correspondence should be addressed:

11          Tel: +82-42-350-2623

12          Fax: +82-42-350-2610

13          E-mail: [daeyoup@kaist.ac.kr](mailto:daeyoup@kaist.ac.kr)

14

15

16

17

18

19

20

21

22

23

24

## 25 **Abstract**

26 Promoter-proximal pausing of RNA polymerase II (RNAPII) is a critical step in early  
27 transcription elongation for the precise regulation of gene expression. Here, we provide evidence  
28 of promoter-proximal pausing-like distributions of RNAPII in *S. cerevisiae*. We found that genes  
29 bearing an alternative pausing site utilize Ino80p to properly localize RNAPII pausing at the first  
30 pausing site and to suppress the accumulation of RNAPII at the second pausing site, which is  
31 tightly associated with the +1 nucleosome. This alternative pausing site determination was  
32 dependent on the remodeling activity of Ino80p to modulate the +1 nucleosome position and  
33 might be controlled synergistically with Spt4p. Furthermore, we observed similar Ino80-  
34 dependent RNAPII pausing in mouse embryonic stem cells (mESCs). Based on our collective  
35 results, we hypothesize that the chromatin remodeler Ino80 plays a highly conserved role in  
36 regulating early RNAPII elongation to establish intact pausing.

37

## 38 **Introduction**

39 Emerging evidence indicates that promoter-proximal pausing is a decisive step in  
40 transcription that supports the precise control of gene expression in metazoans (1). The  
41 establishment and release of paused RNAPII are strictly regulated by several factors during the  
42 early transcription elongation stage. Early biochemical studies using a purified system provided  
43 key mechanistic insights into pausing, showing that it is governed by two critical factors: DRB-  
44 sensitivity-inducing factor (DSIF; the heterodimeric Spt4/Spt5 complex) (2) and negative  
45 elongation factor (NELF) (3). Advances in genomic technology have enabled researchers to track  
46 the position of elongation complexes genome-wide by several methods, such as by capturing  
47 actively elongating RNAPII (4-6) or selecting RNAPII-associated RNAs (7, 8). The use of deep  
48 sequencing methods revealed that the loss of NELF reduced but did not completely abolish  
49 promoter-proximal pausing (9, 10), suggested that NELF acted to stabilize pausing rather than

50 initiate it. Recent studies revealed that RNAPII pausing is found in species that lack NELF  
51 homologs, such as *C. elegans* (11) and *S. pombe* (12). Even *E. coli* RNA polymerases have been  
52 shown to pause at the start of the lambda gene (13). Further, the capture of nascent transcripts by  
53 native elongating transcript sequencing (NET-seq) in *S. cerevisiae* revealed that well-expressed  
54 genes exhibit a modest accumulation of read density downstream of the transcription start site  
55 (TSS) (7), which caused the non-uniform distribution of transcription elongation across genes.  
56 Overall, these previous studies have suggested that a conserved regulatory mechanism is involved  
57 in the early transcription elongation of yeast.

58 The nucleosome poses a strong barrier for RNAPII passage at various stages of transcription,  
59 and cells benefit from employing highly conserved chromatin remodelers to overcome these  
60 physical barriers (14). Several studies have shown that pausing occurs in close proximity to  
61 nucleosomes (7, 12, 15, 16). This suggested that nucleosomes can physically block the elongation  
62 of RNAPII, and that this collision causes RNAPII to pause. A genome-wide study targeting  
63 mouse Chd1 revealed that an ATPase inactive form of Chd1 results in a particular increase of  
64 RNAPII within the promoter regions (17), implying that chromatin remodeling could affect the  
65 promoter escape and subsequent pause-release of RNAPII. However, it remains unclear whether  
66 chromatin remodelers regulate nucleosome architecture to tune promoter-proximal pausing in the  
67 early elongation stage.

68 The chromatin remodeler, Ino80, has been shown to play a key role in the regulation of  
69 RNAPII at transcribed genes through its remodeling activity (18). The most well-known function  
70 of Ino80 is to exchange the highly conserved histone variant H2A.Z for H2A (19, 20). However,  
71 two recent studies disputed this function (21, 22). Several studies have suggested that Ino80p has  
72 the intrinsic capability of nucleosome spacing, and that it helps organize the intact nucleosome  
73 architecture around the promoter to regulate transcription (23, 24). Ino80 is largely enriched at the  
74 TSS of most genes in yeast and mammals (20, 25) and it has suggested that the recruitment of

75 Ies6, the component of Ino80 complex, to the 5' end of genes caused removal of histone H3-  
76 containing nucleosomes for gene expression in *S. pombe*. (26). Ino80 has also been shown to  
77 physically interact with the elongating RNAPII (27, 28). Nevertheless, the detailed mechanisms  
78 through which Ino80 regulates transcription elongation are currently unknown.

79 Here, we reveal the non-uniform distribution of elongating RNAPII in *S. cerevisiae* and  
80 show that it resembles promoter-proximal pausing in metazoans. Using the auxin-inducible  
81 degron (AID) system (29, 30), we found that Ino80p plays a key function in determining the  
82 position of RNAPII pausing in budding yeast. The genes whose pausing sites are regulated by  
83 Ino80p exhibited the use of an alternative pausing site rather than a focused pausing peak. The  
84 chromatin remodeling activity of Ino80p to properly localize the +1 nucleosome is essential to  
85 suppress RNAPII pausing at the second pausing site, thereby facilitating the utilization of the first  
86 pausing site. Further, we observed similar Ino80-dependent RNAPII pausing in mESCs,  
87 suggesting that Ino80 plays a highly conserved role in the regulation of RNAPII pausing.

88

## 89 **Results**

### 90 **PRO-seq reveals genome-wide promoter-proximal pausing-like distributions in *S. cerevisiae***

91 To investigate the genome-wide distribution of elongation-competent RNAPII in *S.*  
92 *cerevisiae*, we first used Precision Run-On sequencing (PRO-seq) and Precision Run-On 5' cap  
93 sequencing (PRO-cap) with 2-biotin run-on (biotin-11-CTP and UTP) (6, 12) (table S1). To  
94 more precisely define the transcription initiation sites, we chose the single base pair with the most  
95 PRO-cap reads within 250 bases upstream and downstream of the annotated TSS. We herein refer  
96 to the newly defined observed TSS as a "TSS" unless otherwise noted. Unexpectedly, PRO-seq  
97 revealed that transcription elongation was non-uniformly distributed: It was concentrated near  
98 TSSs, with a pattern resembling that associated with promoter-proximal pausing in metazoans  
99 (Fig. 1A; See black line of the profile). This was surprising because a previous study using PRO-

100 seq in *S. cerevisiae* had captured a relatively uniform distribution of RNAPII across genes (12).  
101 To examine the significance of these apparent pausing-like features, we next classified genes as  
102 being paused or not paused, as described in the previous study (12). We identified 2,599 (45.5%)  
103 high-confidence paused and 2,099 (37.7%) not-paused genes among 5,315 filtered protein-coding  
104 genes (Fig. 1, A and B). The prevalence of pausing in *S. cerevisiae* was thus higher than that  
105 observed in *S. pombe* (28%) (12) and human (41%) (4) but lower than that observed in *D.*  
106 *melanogaster* (63%) (9). However, these differences in the relative number of paused genes could  
107 be a consequence of using different methods or gene sets to define RNAPII pausing (31).

108 We next sought to identify the general features of the paused genes in *S. cerevisiae*. To  
109 investigate whether the obtained PRO-seq reads were related to transcriptional activity or  
110 nucleosome density, we generated heatmaps of our data sets obtained from PRO-seq, PRO-cap,  
111 and existing data sets obtained using MNase-seq (29) and ChIP-seq against TBP and phosphor-  
112 Ser5 of RNAPII C-terminal domain (pSer5) (32). The RNAPII intensity within the promoter-  
113 proximal regions (TSS to TSS+250bp) generally correlated with the transcriptional activity (Fig.  
114 1C); in this, our results were consistent with those of a previous study (4). In addition, the  
115 heatmaps showed that the higher the PRO-seq intensity, the lower the nucleosome occupancy and  
116 the wider the nucleosome free region (NFR) (Fig. 1C); this, too, was in accordance with earlier  
117 reports (33). Further, we compared our PRO-seq data with previously reported data sets obtained  
118 using Rpb3 NET-seq (7) and ChIP-seq (34). Consistent with our gene classification results, the  
119 NET-seq and ChIP-seq data displayed much higher enrichment at the TSS of paused genes  
120 compared to not-paused genes (Fig. 1D). Overall, we concluded that slowed RNAPII in *S.*  
121 *cerevisiae* is a conserved aspect of early transcription elongation that resembles promoter-  
122 proximal pausing in metazoans.

123 **Pausing-like feature in budding yeast is broader and more distal than that in metazoans**

124 Despite this expectation, we observed a striking difference in the PRO-seq distributions of *S.*  
125 *cerevisiae* compared to metazoans. The peak of the PRO-seq enrichment within the promoter-  
126 proximal regions was located ~100bp downstream of the TSS (Fig. 1A, Left). This localization  
127 was much farther downstream than the peak of the Global Run-On sequencing (GRO-seq) or the  
128 PRO-seq enrichment in metazoans, which showed the read peaks at ~50bp downstream of the  
129 TSS in the sense strand (4, 5). Given that PRO-seq can track transcription elongation at almost  
130 single base-pair resolution, we defined the single-nucleotide of the maximum PRO-seq read  
131 within the promoter-proximal regions as the pausing site, as described in a recent study (16). The  
132 cumulative curve demonstrated that the 25<sup>th</sup> and 75<sup>th</sup> percentiles of the distance from the TSS to  
133 pausing site were 74 and 154 bp, respectively (Fig. 1E; The red dotted lines). To determine the  
134 association between pausing and the +1 nucleosome, we generated an average profile of existing  
135 MNase-seq data used in Fig. 1C around the TSS (Fig. 1F, Left; The 25<sup>th</sup> and 75<sup>th</sup> percentiles of  
136 the distance from the TSS to the pausing site are represented as the two red dotted lines) and our  
137 PRO-seq data around the +1 dyad, which was determined by the same MNase-seq data (Fig. 1F,  
138 Right). Interestingly, the majority of pausing sites were found to be located downstream of the +1  
139 nucleosome. This is consistent with the previous report using NET-seq, which showed the peak of  
140 mean pause density downstream of the +1 nucleosome dyad (7). In contrast, RNAPII is generally  
141 paused upstream of the +1 dyad (5, 15, 16) in metazoans. This difference suggests that RNAPII  
142 undergoes a longer elongation period before pausing in budding yeast compared to metazoans  
143 and it could likely be attributed to differences in promoter structure. The +1 nucleosome typically  
144 includes a TSS for most yeast genes, whereas the +1 nucleosome of metazoans is located  
145 downstream of the TSS (35, 36).

#### 146 **Loss of Ino80p causes variation in fitness and the PRO-seq pattern**

147 Given the apparent role of Ino80p in transcription elongation (18), we used PRO-seq to  
148 investigate the role of Ino80p in nascent transcription at nearly single-nucleotide resolution. We

149 first set out to map transcription elongation in wild-type and *ino80Δ* cells. Interestingly, *ino80Δ*  
150 cells exhibited a 5'-direction skew of the promoter-proximal peak in replicates 2 (*ino80Δ\_2*) and  
151 3 (*ino80Δ\_3*) relative to that in wild-type cells (fig. S1A). However, these results were not  
152 comparable, as replicate 1 (*ino80Δ\_1*) did not show a skewed PRO-seq distribution (fig. S1A).  
153 Consistent with our PRO-seq results, the cells of same batch used to generate *ino80Δ\_1* exhibited  
154 better growth than *ino80Δ\_2* and *ino80Δ\_3* (fig. S1B). These variations in the PRO-seq  
155 distribution and cellular fitness of *ino80Δ* cells seem to be attributed to the appearance of  
156 revertant due to the severe growth defect of *ino80Δ*. Thus, we employed an auxin-inducible  
157 degradation system (29, 30), with the goal of generating highly reproducible data and exclude the  
158 indirect effect of Ino80p in transcription elongation. Briefly, Ino80-AID strains were grown to  
159 mid-log phase in yeast peptone dextrose (YPD) containing ethanol (Ctrl). Ethanol was washed  
160 from the media and the cells were incubated with auxin (0.5mM) for 3 hrs (KD). Auxin was  
161 washed from the media and cells were incubated in auxin-free medium for an additional 3 hrs  
162 (Rescue) (fig. S1C). Western blot analysis confirmed the conditional depletion and recovery of  
163 Ino80p in an AID-tag-dependent manner after the 3 hrs incubations with or without auxin (fig.  
164 S1D).

165 **Ino80p is critical to the proper positioning of RNAPII pausing at the genes bearing an**  
166 **alternative pausing site**

167 We carried out PRO-seq experiments to determine whether Ino80p knockdown (Ino80p-KD)  
168 caused a similar skewed pattern of the promoter-proximal peak in *ino80Δ* cells. The average  
169 profile of the median PRO-seq intensity for paused genes (N = 2,599) displayed a general skew of  
170 the promoter-proximal signal in the 5' direction upon Ino80p-KD (fig. S2A). The pausing sites  
171 observed after 0 hr and 3 hrs of auxin treatment in Ino80-AID cells, which were assigned as  
172 described above, were designated “the 1<sup>st</sup> pausing site” and “the 2<sup>nd</sup> pausing site”, respectively.  
173 Cumulative curves and boxplots of the distance between the TSS and the pausing site revealed

174 that the pausing site was significantly shifted in the 5' direction upon Ino80p-KD (fig. S2B). To  
175 analyze this RNAPII transition in detail throughout the genome, we generated a heatmap of the  
176 PRO-seq log<sub>2</sub> fold change around the 1<sup>st</sup> pausing site. Interestingly, 12.6% of the paused genes (N  
177 = 2,599) were shifted toward 3' upon Ino80p-KD; however, consistent with our cumulative curve  
178 and boxplot data, the 5' shift was stronger and more frequent (28.5%) (fig. S2C). We chose  
179 transcripts that showed shifts of more than 30bp in their pausing site upon Ino80p-KD (to enable  
180 us to observe a clear change in position) and investigated whether the pausing site tended to be  
181 restored upon Ino80p rescue. Indeed, a boxplot analysis indicated that the changes of pausing site  
182 were significantly recovered under auxin withdrawal for both shifted gene sets (fig. S2D). In  
183 contrast, Ino80p rescue did not affect pausing sites in genes that were not shifted upon Ino80p-  
184 KD. These results suggest that Ino80p plays a previously unrecognized function in proper  
185 localization of RNAPII pausing sites in the early elongation stage for a subset of genes.

186 To select genes directly regulated by Ino80p, we chose transcripts that were shifted more  
187 than 30bp upstream in knockdown cells and restored in rescued cells (N = 221) and those that  
188 failed to show any shift under knockdown or subsequent restoration (N = 1,211). We referred to  
189 the former gene set as “shift-to-5’ genes” and the latter as “no-shift genes”. To examine whether  
190 the assigned pausing site precisely reflects the peak of pausing, we generated the average profile  
191 of the median PRO-seq signal around the TSS for shift-to-5’ genes. We observed that the PRO-  
192 seq peak exhibited striking upstream movement upon Ino80p-KD (Fig. 2A; The arrows and  
193 below dotted lines represent the median of the pausing sites). As expected, this shifted pausing  
194 was almost completely restored to the 1<sup>st</sup> pausing site when Ino80p was rescued (Fig. 2A). Thus,  
195 our results suggest that this pausing site determination is totally Ino80p expression-dependent.

196 To investigate the general features of Ino80p-dependent genes, we compared the PRO-seq  
197 pattern at the 1<sup>st</sup> pausing site under untreated conditions for no-shift genes and shift-to-5’ genes.  
198 Surprisingly, we observed only a small accumulation of PRO-seq signal upstream of the peak at



199 the 1<sup>st</sup> pausing site for shift-to-5' genes, whereas no-shift genes displayed only a single sharp and  
200 distinct peak (Fig. 2B). The 25<sup>th</sup> and 75<sup>th</sup> percentiles of the 2<sup>nd</sup> pausing site relative to the 1<sup>st</sup>  
201 pausing site for shift-to-5' genes (represented by the red dotted lines in the Fig. 2B) indicated that  
202 Ino80p-KD displaces RNAPII solely at locations where pausing can also occur but not a main  
203 pausing site. These results implied that Ino80p-dependent genes bear an alternative pausing site  
204 and utilize Ino80p to facilitate RNAPII pausing at the main pausing site. Further, we found that  
205 pausing at the 1<sup>st</sup> pausing site was decreased upon Ino80p-KD and recovered upon Ino80p rescue  
206 (Fig. 2C, Upper) for shift-to-5' genes, whereas pausing at the 2<sup>nd</sup> pausing site showed an opposite  
207 tendency (Fig. 2C, Bottom). Thus, we propose that Ino80p is critical for the passage of RNAPII  
208 from the 2<sup>nd</sup> pausing site to the 1<sup>st</sup> pausing site for the establishment of intact pausing. We also  
209 noted that the elongating RNAPII at the 2<sup>nd</sup> pausing site in untreated Ino80-AID cells was above  
210 the basal level (Fig. 2C, Bottom; Ctrl sample), which is consistent with the hypothesis that  
211 RNAPII could also pause at the 2<sup>nd</sup> pausing site in the physiological state, but it does not  
212 represent a major pausing site. Supporting this idea, the sequence preferences at the 1<sup>st</sup> and the 2<sup>nd</sup>  
213 pausing site generated by WebLogo (37) exhibited a marked similarity (fig. S2E), suggesting the  
214 involvement of *cis*-acting nucleic acid sequences in RNAPII pausing. Overall, these results  
215 implied that Ino80p might play a pivotal role in determining proper pausing sites on genes  
216 bearing alternative pausing sites.

### 217 **The transition of the pausing site in Ino80p-KD is independent of both TSS usage and** 218 **H2A.Z<sup>Htz1</sup>**

219 We next determined whether the observed transition of RNAPII pausing was due to a defect  
220 in TSS usage. The precise transcription initiation sites for shift-to-5' genes upon Ino80p-KD were  
221 identified by the maximum PRO-cap read within 100bp around the defined TSS in control  
222 samples. Histograms of the distance between the TSS in control and knockdown samples  
223 indicated that the majority of these genes exhibited no differences in transcription initiation site

224 (fig. S2F, Left). This suggested that the Ino80p-dependent positioning of RNAPII pausing may  
225 result from a defect in transcription elongation rather than a defect in TSS usage. To further  
226 investigate whether the PRO-cap intensity was altered upon Ino80p-KD, we measured the log<sub>2</sub>  
227 fold change of the PRO-cap signal 100bp around the TSS for shift-to-5' or no-shift genes (fig.  
228 S2F, Right). Our boxplot analysis demonstrated that the changes in PRO-cap signal for shift-to-5'  
229 genes showed a greater decrease than those for no-shift genes, suggesting that there may be an  
230 association between pausing site determination and the abundance of 5' capped RNA.

231 Given that previous reports proposed a connection between Ino80p and H2A.Z<sup>Htz1</sup> (19, 22),  
232 we questioned whether the transition of RNAPII could be caused by the insufficient removal of  
233 H2A.Z<sup>Htz1</sup>. To test this possibility, we carried out PRO-seq experiments in *htz1Δ* cells. The  
234 average profile, however, revealed that *htz1Δ* did not result in a skewed pattern of the promoter-  
235 proximal peak similar to that seen for the shift -to-5' genes upon Ino80p-KD (fig. S2G, Left).  
236 Moreover, the distance of pausing site shift in Ino80p-KD showed no significant correlation with  
237 H2A.Z<sup>Htz1</sup> enrichment in the +1 nucleosome, which is calculated from an existing MNase-ChIP-  
238 seq (38) (fig. S2G, Right). Thus, we conclude that the function of Ino80p in pausing site  
239 positioning is independent of its role in restricting the localization of H2A.Z<sup>Htz1</sup>, at least for shift-  
240 to-5' genes. Consistent with this proposal, previous studies showed that the occupancy of  
241 H2A.Z<sup>Htz1</sup> on chromatin is not altered under Ino80 depletion (21, 22).

### 242 **The transition of RNAPII pausing is closely associated with the +1 nucleosome**

243 We questioned whether the transition of RNAPII upon Ino80p-KD was associated with the  
244 nucleosome architecture around the pausing site. To address this, we first analyzed the average  
245 profile of an existing MNase-seq data generated using untreated Ino80-AID cells (29), which is  
246 the same cell background used in our PRO-seq. Surprisingly, the nucleosome distribution relative  
247 to the 1<sup>st</sup> pausing site of shift-to-5' genes displayed a much better phase than that of no-shift  
248 genes (Fig. 3A). Also, the +1 nucleosome tended to be located in closer proximity to the 2<sup>nd</sup>

249 pausing site than the 1<sup>st</sup> pausing site (Fig. 3A; The 25<sup>th</sup> and 75<sup>th</sup> percentiles of the 2<sup>nd</sup> pausing site  
250 relative to the 1<sup>st</sup> pausing site are represented as the two dotted lines). This implicated that the  
251 ability of Ino80p to suppress RNAPII pausing at the 2<sup>nd</sup> pausing site in a nucleosome context-  
252 dependent manner. We also examined existing MNase-seq data obtained upon Ino80p-KD (29).  
253 While the nucleosome distribution for no-shift genes showed almost no difference, that for shift-  
254 to-5' genes exhibited a moderate disturbance in nucleosome positioning and a decrease in the +1  
255 nucleosome occupancy upon knockdown (Fig. 3B). When we performed the same analysis for  
256 MNase-seq data distributed by other laboratories (32), which differed slightly in the cell  
257 background, incubation temperature, and auxin treatment time, we obtained similar results (fig.  
258 S3, A and B).

259 To continue addressing the association of the 2<sup>nd</sup> pausing site with the +1 nucleosome, we  
260 next evaluated the PRO-seq distribution around the +1 dyad (defined in Fig. 1F). To discard  
261 false-positive nucleosome positions, we excluded nucleosomes that did not overlap the H3K4me3  
262 ChIP-seq enrichment calculated from the existing data (34), as previously reported (16). We  
263 generated a composite profile centered on the +1 dyad and a boxplot of the distance to pausing  
264 site from the +1 dyad. No-shift genes were divided by whether they exhibited a pausing site  
265 outside (N = 463) or inside (N = 401) of the +1 nucleosome, to clearly distinguish the changes in  
266 PRO-seq distribution. Neither group of no-shift genes displayed any distinct change in pausing  
267 site relative to the +1 dyad upon Ino80p-KD (fig. S3C). In striking contrast, we observed that the  
268 transition from the 1<sup>st</sup> to the 2<sup>nd</sup> pausing site occurred through the +1 nucleosome for shift-to-5'  
269 genes (N = 160) (Fig. 3C). It seemed that the large fraction of elongating RNAPII could not pass  
270 the +1 nucleosome upon Ino80p-KD. Rescue of Ino80p expression caused almost perfect  
271 restoration of the pausing site to the downstream of the +1 nucleosome, further supporting the  
272 direct function of Ino80p. Based on these findings, we propose that the regulation of the

273 nucleosome positioning around the 1<sup>st</sup> pausing site by Ino80p is critical to suppress RNAPII  
274 accumulation at the 2<sup>nd</sup> pausing site.

### 275 **Ino80 remodeling activity might be critical in pausing site determination**

276 To distinguish whether the regulation of nucleosome positioning around the pausing site  
277 depends on direct remodeling activity of Ino80p or other *trans*-activating factors associated with  
278 Ino80p, we carried out PRO-seq experiments in *arp5Δ* cells, which lack a component that is  
279 essential for the chromatin remodeling activity of Ino80p complex in *S. cerevisiae* (39-41). When  
280 we analyzed the defined paused genes as described for Ino80p-KD cells, we observed that a  
281 similar shift of pausing site toward the inside of the +1 nucleosome occurred solely for pausing  
282 site shifted toward 5' genes (> 30bp) in *arp5Δ* (N = 264) (Fig. 3D and fig. S3D). Corroborating  
283 this, a Venn diagram analysis revealed that there was a significant overlap ( $P$  value =  $1.52 \times 10^{-12}$ )  
284 between shift-to-5' genes upon Ino80p-KD and genes showing an upstream shift of RNAPII  
285 pausing in *arp5Δ* (fig. S3E). Thus, we concluded that the chromatin remodeling activity of the  
286 Ino80p complex to the +1 nucleosome plays an important role in well-positioning of RNAPII  
287 pausing.

### 288 **The conserved pausing factor, Spt4p, plays a similar role in regulating alternative pausing** 289 **site**

290 Since a previous study suggested that the conserved pausing factor, Spt4p, is required to  
291 facilitate productive transcription elongation in *S. cerevisiae* (12), we postulated Spt4p is also  
292 critical for transitioning the elongating RNAPII from the 2<sup>nd</sup> to the 1<sup>st</sup> pausing site. To examine this,  
293 we conducted PRO-seq in *spt4Δ* cells. Using the same set of analyses performed with the PRO-  
294 seq data in Ino80p-KD, we selected pausing site shifted toward 5' direction (> 30bp) gene sets in  
295 *spt4Δ* (N = 784). As expected, we observed a similar upstream skewed pattern of the PRO-seq  
296 peak in *spt4Δ* relative to wild-type within the promoter-proximal regions (Fig. 4, A and B).  
297 Further, PRO-seq signal in *spt4Δ* showed a prominent increase immediately downstream of the

298 TSS, which was consistent with the previous report (12). There was a significant overlap ( $P$  value  
299 =  $5.40 \times 10^{-8}$ ) between shift-to-5' genes upon Ino80p-KD and Spt4p-regulated genes (Fig. 4C). We  
300 also observed strong negative genetic interactions between *INO80* and both *SPT4* and *PAF1* (Fig.  
301 4D), the latter of which has been shown to physically interact with DSIF and RNAPII and  
302 facilitate RNAPII pausing (42-44). Recent work showed that Spt4, Spt5, and the additional  
303 elongation factor Elf1 could cooperatively prevent RNAPII pausing at SHL(-6), SHL(-5) and  
304 SHL(-2) *in vitro* (45), suggesting that Spt4 plays a role in overcoming the nucleosome barrier.  
305 Based on these results, we propose that Ino80p and Spt4p synergistically regulate the ability of  
306 elongating RNAPII to travel along the +1 nucleosome and establish intact pausing in *S.*  
307 *cerevisiae*.

### 308 **The role of Ino80p in RNAPII pausing is conserved in mESCs**

309 Since the Ino80 complex is a highly conserved chromatin remodeler from yeast to humans  
310 (18), we investigated whether Ino80 loss also caused a defect in elongating RNAPII positioning  
311 before pause-release in mESCs. Toward this end, we carried out PRO-seq experiments in mESCs  
312 treated with either *siEgfp* or *siIno80* (fig. S4A). To more precisely identify the peak of promoter-  
313 proximal pausing, we tiled 1kb around the annotated TSSs ( $TSS \pm 1kb$ ) in a 50-bp window with a  
314 5-bp shift, as previously reported (4). We selected the window showing the maximum PRO-seq  
315 reads, and designated the 5' end of the selected window as the "PRO-seq peak". The average  
316 profile of median PRO-seq intensity in mESCs treated with *siEgfp* revealed an almost 2-fold  
317 higher PRO-seq intensity at the PRO-seq peak than at the annotated TSS (fig. S4B). Because the  
318 PRO-seq signal was highly confined around the PRO-seq peak regions, we determined the  
319 regions from 100bp upstream to 200bp downstream of the PRO-seq peak as the promoter-  
320 proximal regions for mESCs. Based on the PRO-seq coverage of these regions, we classified  
321 genes as being high-confidence paused ( $N = 27,406$ ; 78.5%) or high-confidence not paused ( $N =$   
322  $5,427$ ; 16.3%) among the total protein-coding genes ( $N = 31,173$ ). To analyze the RNAPII

323 pausing shift under Ino80-KD, we defined the 1<sup>st</sup> and the 2<sup>nd</sup> pausing site for each gene in the  
324 same manner as in *S. cerevisiae*. To distinguish the pattern of RNAPII transition for each gene,  
325 we generated a heatmap of the PRO-seq log<sub>2</sub> fold change around the pausing site (fig. S4C).  
326 However, the results obtained from these analyses differed from those observed in *S. cerevisiae*  
327 (fig. S2C and fig. S4C). Although the 2<sup>nd</sup> pausing site was shifted upstream relative to the 1<sup>st</sup>  
328 pausing site for a small fraction of genes (N = 1,082; 8.9%) upon Ino80-KD, a much larger  
329 fraction of genes (N = 2,635; 23.2%) displayed a downstream shift in mESCs (fig. S4C).

330 Except for the direction of shift, however, Ino80-KD in mESCs yielded a pausing site-  
331 determination defect similar to that observed in *S. cerevisiae*. First, the average profile of the  
332 median PRO-seq signal around the PRO-seq peak regions for genes whose pausing site shifted  
333 more than 30bp in the 3' direction upon Ino80-KD (“shift-to-3' genes”; N = 2,324) revealed that  
334 Ino80-KD induced prominent downstream movement of RNAPII pausing (Fig. 5A; The arrows  
335 and below dotted lines represent the median of the pausing sites). Second, these shift-to-3' genes  
336 exhibited the use of an alternative pausing site rather than a focused pausing peak in the  
337 physiological conditions (Fig. 5B). Ino80-KD displaces RNAPII solely at locations where  
338 pausing can also occur (Fig. 5B; The 25<sup>th</sup> and 75<sup>th</sup> percentiles of the 2<sup>nd</sup> pausing site relative to the  
339 1<sup>st</sup> pausing site for shift-to-3' genes are represented as the two red dotted lines). Third, whereas  
340 pausing at the 1<sup>st</sup> pausing site was decreased by Ino80-KD, pausing at the 2<sup>nd</sup> pausing site was  
341 significantly increased under the same condition (Fig. 5C). The sequence preferences at each  
342 pausing site were also similar (fig. S4D). Furthermore, *de novo* motif finding analysis using  
343 HOMER (46) indicated that the YY1 motif was significantly enriched in the promoter regions of  
344 shift-to-3' genes relative to no-shift genes (fig. S4E). YY1 is physically associated with the  
345 mammalian Ino80 complex (47), providing additional support for the engagement of Ino80 with  
346 these genes. We did not observe a similar motif in *S. cerevisiae*, perhaps reflecting its lack of an  
347 identified homolog for YY1 (48). Based on our findings, we conclude that Ino80 plays a

348 conserved role in determining where RNAPII should mainly pause at the genes bearing an  
349 alternative pausing site in the early transcription elongation stage in mESCs.

350 We next deciphered whether the 2<sup>nd</sup> pausing site was also associated with the +1 nucleosome  
351 in mESCs. We analyzed an existing MNase-seq data set obtained from untreated mESCs (49).  
352 We observed the better positioned +1 nucleosome for shift-to-3' genes (N = 2,324) relative to no-  
353 shift genes (N = 16,903) (Fig. 5D), and found the proximity of the 2<sup>nd</sup> pausing site to the +1  
354 nucleosome (Fig. 5D; The dotted lines represent the 25<sup>th</sup> and 75<sup>th</sup> percentiles of the 2<sup>nd</sup> pausing  
355 site relative to the 1<sup>st</sup> pausing site). This suggested that the nucleosome context around the 1<sup>st</sup>  
356 pausing site are important for mESCs to suppress the 2<sup>nd</sup> pausing site, as also found in budding  
357 yeast. Consistent with previous reports, the PRO-seq signals corresponding to the 1<sup>st</sup> pausing site  
358 for mammalian shift-to-3' genes were located near the entrance of the +1 nucleosome (Fig. 5E)  
359 (5, 15, 16). The PRO-seq signals corresponding to the 2<sup>nd</sup> pausing site, however, were found  
360 between the 1<sup>st</sup> pausing site and the +1 dyad (Fig. 5E). In control analysis, we detected almost no  
361 difference in the PRO-seq pattern around the +1 dyad for no-shift genes (fig. S4F). From these  
362 results, we conclude that Ino80 plays a conserved regulatory role in proper localization of  
363 RNAPII pausing at the 1<sup>st</sup> pausing site in a nucleosome-context-dependent manner in various  
364 organisms, from budding yeast to mouse (Fig. 6).

365

## 366 Discussion

367 We found highly confined PRO-seq signals immediately downstream of the observed TSSs  
368 in *S. cerevisiae*, which yielded a pattern that was highly similar to that representing promoter-  
369 proximal pausing in metazoans. However, the slowed promoter-proximal elongation in *S.*  
370 *cerevisiae* occurred more broadly and RNAPII seemed to be paused farther downstream than in  
371 metazoans. Indeed, most of the 1<sup>st</sup> pausing sites were located downstream of the +1 nucleosome.  
372 This finding was unlike that in higher eukaryotes, where most pausing was found to occur

373 upstream of the +1 dyad (5, 15, 16). One of the reasons for this discrepancy might be that NELF,  
374 which is involved in the pausing of RNAPII at a more promoter-proximal region (50), is not  
375 conserved in yeasts, including *S. cerevisiae* and *S. pombe* (51, 52). The hypothesis is consistent  
376 with the PRO-seq distribution reported for *S. pombe*, which showed a near-overlapping  
377 association of RNAPII pausing with the +1 dyad (12).

378 Surprisingly, Ino80 knockdown yielded opposite shifts of the RNAPII pausing sites in  
379 budding yeast and mESCs. One possible explanation is that Ino80 plays different roles in these  
380 species, since the Ino80 complex contains species-distinct components that could target Ino80 to  
381 specific contexts. Alternatively, our observation that the nucleosome distribution around the  
382 pausing site was similar in the two organisms led us to postulate that these discrepancies could be  
383 due to differences in the chromatin architectures around promoter regions in budding yeast versus  
384 mESCs (35, 36). In *S. cerevisiae*, the +1 nucleosome generally includes a TSS for most genes.  
385 Thus, most of the 1<sup>st</sup> pausing sites are downstream of the +1 nucleosome. The loss of Ino80p  
386 induced the main pausing site to shift toward the +1 nucleosome, accompanied by both a  
387 moderate increase in nucleosome fuzziness and a decrease in the +1 nucleosome occupancy. This  
388 suggests that Ino80p may play a critical role in the passage of elongating RNAPII from the 2<sup>nd</sup> to  
389 1<sup>st</sup> pausing site and helps establish intact pausing through its activity to position the +1  
390 nucleosome. Supporting our hypothesis, previous studies showed an increase of nucleosome  
391 fuzziness in Ino80p mutants (21, 41) and demonstrated that Ino80p functions to pull the +1  
392 nucleosome toward the NFR for a subset of genes (32). In higher eukaryotes, the +1 nucleosome  
393 is located farther downstream of TSS than in budding yeast. Consistent with this, the median 1<sup>st</sup>  
394 pausing site for Ino80-dependent genes in mESCs was found to be upstream of the +1  
395 nucleosome (Fig. 5E; The median of the *siEgfp* treated samples was 84bp upstream of the +1  
396 dyad). On one hand, this could reflect that Ino80 can promote RNAPII pausing in a nucleosome-  
397 independent manner. Alternatively, a previous study implied that the positioned +1 nucleosome



398 recruits more NELF and enhances promoter-proximal pausing (53). Thus, mammalian Ino80-  
399 dependent nucleosome positioning may also work to establish RNAPII pausing through recruiting  
400 *trans*-activating pausing factors. Consistent with this scenario, RNAPII resumed elongation to the  
401 2<sup>nd</sup> pausing site upon the loss of Ino80 (Fig. 5E). The delocalization of the +1 nucleosome due to  
402 Ino80 depletion probably allows further elongation of RNAPII, and the 2<sup>nd</sup> pausing that occurs  
403 around 30bp upstream of the +1 dyad (Fig. 5E; The median of the *siIno80* treated samples) might  
404 be due to a physical blocking of the +1 nucleosome. This location seems to be close to the  
405 location of SHL(-2), at which transcribing RNAPII can be stalled *in vitro* (54). Based on the  
406 present and previous findings, we suggested that the nucleosome-dependent intrinsic pausing at  
407 the 2<sup>nd</sup> pausing site is conserved from budding yeast to mESCs, and that Ino80 plays a key role in  
408 actively determining the main pausing site through its ability to modulate +1 nucleosome  
409 positioning in a context-dependent manner (Fig. 6). In support of our hypothesis, we note that a  
410 recent study using human NELF-C-AID suggested that NELF loss results in a similar  
411 downstream shift of RNAPII pausing accumulated at the 2<sup>nd</sup> pausing site, which is tightly  
412 associated with the +1 nucleosome (16).

413 Supporting the idea that the between-species discrepancies in RNAPII pausing observed  
414 herein are due to differences in chromatin architecture, a defect in DSIF was also reported to  
415 cause different phenotype in *S. cerevisiae* versus *M. musculus*. The deletion of Spt4p in budding  
416 yeast showed the prominent increase in PRO-seq signal at the 5' ends of genes (12), whereas Spt5  
417 depletion in mouse triggered the accumulation of PRO-seq signals downstream of the promoter-  
418 proximal regions (55). Interestingly, the directions in which elongating RNAPII accumulated in  
419 the above-described mutants are similar to that observed following Ino80-KD in the present work,  
420 further supporting that Ino80 and DSIF may play synergistic roles in both species. In addition,  
421 Spt4 deletion in *S. pombe* has resulted in PRO-seq distribution resembling a defect upon Spt5 loss  
422 in mouse (12). Intriguingly, a previous study found a similar but distinct nucleosome distribution

423 in budding and fission yeasts (56, 57). Further experiments seeking to gain additional contextual  
424 information or identify unknown factors in *S. pombe* might help explain these discrepancies in  
425 two divergent yeasts.

426 Based on our collective results, slowed elongating RNAPII within the promoter-proximal  
427 regions is an evolutionarily conserved mechanism from yeast to human. Chromatin remodelers  
428 could not only regulate promoter opening and productive elongation but also govern promoter-  
429 proximal RNAPII pausing through its role to tune nucleosome architecture. In the future, it will  
430 be interesting to study the detailed mechanism of chromatin remodeling in the early transcription  
431 elongation.

432

## 433 **Materials and Methods**

### 434 **Yeast strains and cell culture**

435 The budding yeast strains used in this study are listed in table S2. AID-tagged proteins were  
436 conditionally depleted using 250mM auxin (Sigma, I2886) stock dissolved in ethanol at a final  
437 concentration of 0.5mM, as previously described (29). Briefly, Ino80-AID cells were grown to  
438 mid-log phase at 30°C in YPD containing ethanol. The ethanol was removed by media exchange,  
439 cells were incubated with auxin (where indicated) for 3 hrs to allow conditional depletion. The  
440 auxin was removed by media exchange, and cells were incubated in auxin-free medium an  
441 additional 3 hrs. At the indicated time points, Ino80-AID cells were harvested and subjected to  
442 PRO-seq and PRO-cap. The workflow is schematically presented in fig. S1C. The efficiency of  
443 Ino80p knockdown was confirmed by Western blotting. To generate the deletion strains, we  
444 conducted standard LiAc transformation using PCR-based gene targeting. These cells were  
445 incubated to mid-log phase at 30°C in YPD and were subjected to PRO-seq.

### 446 **mESC culture**

447 E14Tg2a mESCs were maintained under feeder-free conditions at 37°C with 5% CO<sub>2</sub> in  
448 humidified air. Briefly, mESCs were cultured on gelatin-coated dishes in Glasgow's minimum  
449 essential medium (GMEM) containing 10% knockout serum replacement (Gibco, 10828-028),  
450 1% non-essential amino acids (Gibco, 11140-050), 1% sodium pyruvate (Gibco, 11360-070), 0.1  
451 mM  $\beta$ -mercaptoethanol (Gibco, 21985-023), 1% FBS (Hyclone, SH30917.03), 0.5% antibiotic-  
452 antimycotic (Thermo, 15140122), and 1,000 units/ml LIF (Millipore, ESG1106).

### 453 **RNA interference**

454 The siRNAs against EGFP (5'-GUUCAGCGUGUCCGGCGAG-3') and Ino80 (5'-  
455 GGCUUAUCUGUAAAGGCACAAUUGA-3') were synthesized and annealed by Bioneer.  
456 mESCs were seeded to plates, incubated for 24 hrs, and transfected with the indicated siRNAs  
457 (final concentration, 50nM) using DharmaFECT I (Dharmacon, T-2001-03) according to the  
458 manufacturer's protocol. Briefly, 50nM of siRNAs and DharmaFECT I diluted in Opti-MEM  
459 (Gibco, 31985062) were separately incubated for 5 min at 25°C, mixed and incubated for 20 min  
460 at 25°C, and then used for transfection. The culture medium was replaced at 24 hrs of transfection  
461 and cells were harvested at 48 hrs of transfection.

### 462 **Western blot analysis of protein depletion**

463 Whole-cell lysates of Ino80-AID cells were prepared using a standard bead-beating protocol, and  
464 proteins were eluted by boiling at 100°C for 5 min in 2x SDS sample buffer (20% glycerol, 0.4%  
465 bromophenol blue, 100mM Tris-Cl, pH6.8, 4% SDS, and 200mM  $\beta$ -mercaptoethanol). The  
466 utilized antibodies included anti-FLAG M2 (Sigma A8592; used at 1:3000) and anti- $\beta$ -actin  
467 (Santa Cruz sc-47778 HRP; used at 1:5000). The AID-tagged Ino80 cells were a gift from the  
468 Friedman lab as previously described (29).

469 mESCs were washed with PBS (Welgene, LB004-02) and detached from the dishes by incubation  
470 with trypsin-EDTA (Gibco, 25300-054) at 37°C for 2 min. The trypsin was inactivated by the  
471 addition of GMEM with 1% FBS and 0.5% antibiotic-antimycotic, and the cells were harvested,

472 washed with PBS, and resuspended in EBC300 (120 mM NaCl, 0.5% NP-40, and 50 mM Tris-Cl,  
473 pH 8.0) containing protease inhibitors. Whole-cell lysates were prepared by vigorously vortexing  
474 the cell mixture for 30 min followed by centrifugation for 30 min at 4°C. Proteins were eluted by  
475 being boiled at 100°C for 5 min with 5x SDS sample buffer. The utilized antibodies included anti-  
476 Ino80 (Abcam, ab118787; used at 1:1000) and anti-tubulin (Cell Signaling, 2144S; used at  
477 1:4000).

#### 478 **Spotting assay**

479 Cells were spotted onto the indicated plate in serial five-fold dilutions starting at 0.5OD, and then  
480 incubated at 30°C for ~2 days.

#### 481 **Yeast cell permeabilization**

482 Yeast cells were permeabilized as described (6) with some of previously reported modifications  
483 (58). Briefly, exponentially growing yeast cells were harvested by centrifugation at 2000rpm for  
484 3min at 4°C. Cells were washed once with ice-cold DEPC-H<sub>2</sub>O. Cell pellets were resuspended in  
485 10ml of 0.5% sarkosyl (Sigma, L5777) and incubated for 20min on ice. Cells were spun down at  
486 400xg for 5min at 4°C and resuspended in storage buffer (10mM Tris-Cl, pH8.0, 25% glycerol,  
487 5mM MgCl<sub>2</sub>, 0.1mM EDTA, and 5mM DTT) to an OD of 5 per 200µl. The solutions were flash-  
488 frozen using LN<sub>2</sub> and stored at -80°C.

#### 489 **Isolation of nuclei**

490 mESCs were transfected with the indicated siRNAs, and nuclei were isolated as described (4, 44)  
491 with some modifications. Briefly, ~20 x 10<sup>6</sup> plated mESCs were washed once with PBS and  
492 detached by incubation with trypsin-EDTA at 37°C for 2min. The trypsin was inactivated by the  
493 addition of GMEM with 1% FBS and 0.5% antibiotic-antimycotic, and the cells were harvested  
494 and washed twice with ice-cold PBS. The cells were resuspended in 5ml of ice-cold swelling  
495 buffer (20mM Tris-Cl, pH7.5, 2mM MgCl<sub>2</sub>, 3mM CaCl<sub>2</sub>, and 2U/ml RNase inhibitor) for 5min  
496 on ice. Lysis buffer (5ml; 20mM Tris-Cl, pH7.5, 2mM MgCl<sub>2</sub>, 3mM CaCl<sub>2</sub>, 0.5% NP-40, 10%

497 glycerol, and 2U/ml RNase inhibitor) was added and the cell pellets were resuspended by gentle  
498 pipetting using an end-cut tip. The cells were centrifuged at 1000xg for 5min at 4°C and the cell  
499 pellets were resuspended in 1ml of freezing buffer (50mM Tris-Cl, pH8.3, 40% glycerol, 5mM  
500 MgCl<sub>2</sub>, and 0.1mM EDTA). The pelleted nuclei were transferred into a new 1.5ml tube and were  
501 resuspended in freezing buffer at ~5 x 10<sup>6</sup> nuclei per 100µl. The solutions were flash-frozen using  
502 LN<sub>2</sub> and stored at -80°C.

### 503 **PRO-seq and PRO-cap library preparation**

504 Nuclear run-on reactions and RNA extractions were performed based on the published protocol  
505 (6) with minor modifications that were previously reported (44, 58). Briefly, the flash-frozen  
506 yeast cells were quickly thawed on ice. For the yeast spike-in control, 0.125OD of permeabilized  
507 *S. pombe* (ED665) cells were added to each 5OD of permeabilized *S. cerevisiae* sample before  
508 the nuclear run-on reaction was performed. Combined yeast cells were spun down at 400xg for  
509 5min at 4°C. Nuclear run-on reactions were conducted with 25µM biotin-11-UTP (PerkinElmer,  
510 NEL543001EA), 25µM biotin-11-CTP (PerkinElmer, NEL542001EA), 125µM ATP (Roche,  
511 11140965001), and 125µM GTP (Roche, 11140957001) in run-on reaction buffer (20mM Tris-  
512 Cl, pH7.7, 200mM KCl, 5mM MgCl<sub>2</sub>, 2mM DTT, and 0.4U/µl RNase inhibitor) with 0.5%  
513 sarkosyl. The reaction mixtures were incubated at 30°C for 5min. For the isolated nuclei of  
514 mESCs, nuclear run-on reactions were performed with 25µM biotin-11-UTP (PerkinElmer,  
515 NEL543001EA), 25µM biotin-11-CTP (PerkinElmer, NEL542001EA), 125µM ATP (Roche,  
516 11140965001), and 125µM GTP (Roche, 11140957001) in run-on reaction buffer (5mM Tris-Cl,  
517 pH8.0, 150mM KCl, 2.5mM MgCl<sub>2</sub>, 0.5mM DTT, and 0.4U/µl RNase inhibitor) with 0.5%  
518 sarkosyl. The reaction mixtures were incubated at 37°C for 5 min.

519 RNA was extracted from the run-on-reacted cell pellets using either a standard hot-phenol  
520 method (for yeast samples) or TRIzol LS (Ambion, 10296028; for mESC samples). Next, the  
521 respective library was generated followed using the published PRO-seq or PRO-cap protocols (6)

522 for the steps spanning RNA fragmentation by base hydrolysis to full-scale PCR amplification.  
523 Note that there were a few differences in the applied reagents: we used Superscript IV reverse  
524 transcriptase (Invitrogen, 18091050) instead of Superscript III (Invitrogen, 56575); we used  
525 25mM of each dNTP (Thermo Scientific, R1121) instead 12.5mM of each dNTP (Roche,  
526 03622614001); and we used Phusion High-Fidelity DNA Polymerase (Thermo Scientific, F530L)  
527 instead of Phusion polymerase (NEB, M0530). DNA libraries of ~140 bp to 350 bp were selected  
528 by agarose gel extraction (Zymo Research, D4007) according to the manufacturer's protocol and  
529 sequenced using an Illumina HiSeq X Ten, HiSeq 4000 and NovaSeq 6000.

### 530 **Sequence alignment and data processing (PRO-seq and PRO-cap)**

531 Sequence alignment and data processing were performed based on the publicly available  
532 alignment pipelines of GitHub, as used in the previous study (58) with minor modifications.  
533 Briefly, raw sequencing reads were processed using FASTX-Toolkit  
534 ([http://hannonlab.cshl.edu/fastx\\_toolkit/](http://hannonlab.cshl.edu/fastx_toolkit/)) as follows: Adaptor sequences (5'-  
535 TGG AATTCTCGGGTGCCAAGG-3') were removed, the reads were trimmed to a maximum  
536 length of 36nt and, for PRO-seq, the reads were reverse-complemented. Next, reads that mapped  
537 to rRNA sequences were depleted using SortMeRNA (59), and reads that were not mapped to  
538 rRNA sequences were uniquely aligned to the genome using Bowtie, with the algorithm allowing  
539 for two mismatches (60): The processed reads of yeast samples that were generated with the  
540 spike-in approach were mapped to a combined genome consisting of *S. cerevisiae* (sacCer3) and  
541 *S. pombe* (SpombeASMv2), and then uniquely aligned reads from each genome were parsed for  
542 downstream analysis. The processed reads of mESCs samples were mapped to the *M. musculus*  
543 mm10 genome. The coverage of the aligned reads was generated using the `genomecov` function  
544 of BEDtools (61). Only the most 3' nucleotide of each read was calculated for PRO-seq, and only  
545 the most 5' nucleotide of each read was calculated for PRO-cap. For the spike-in control, the  
546 recorded coverage in the bedGraph file was normalized by the relative number of reads mapped

547 to a *S. pombe* genome (table S1). bedGraph files were converted to BigWig files by  
548 bedGraphToBigWig (62) and the downstream analysis was performed based on the publicly  
549 available custom R scripts on GitHub, as previously reported (58).

550 Protein-coding gene sets based on the annotated data in the Saccharomyces Genome Database  
551 (SGD; N = 6,692) were initially used for *S. cerevisiae* samples. The observed TSS was defined as  
552 the single nucleotide with the most PRO-cap reads within the 250bp upstream and downstream of  
553 the annotated TSS, in a similar manner to that used in the previous report (12). Genes with no  
554 PRO-cap signal, genes that had PRO-seq reads lower than 10, and genes shorter than 300bp were  
555 filtered out; in the end, 5,715 genes were used out of 6,692 SGD genes. For mESCs, protein-  
556 coding gene sets based on the RefSeq annotation were downloaded from UCSC Genome  
557 Browser. Genes that had PRO-seq reads lower than 10 and those shorter than 1kb were discarded;  
558 in the end, 31,173 genes were selected out of 37,802 genes. The annotated TSS  $\pm$  1kb was tiled in  
559 a 50-bp window by shifting 5 bp, and the PRO-seq coverage for each window was measured. The  
560 window of the most PRO-seq reads was selected and the 5' position of the selected window was  
561 used as the PRO-seq peak, in a manner similar to that described in a previous study (4). To  
562 identify paused gene sets, mappable reads within the promoter-proximal regions and gene-body  
563 regions were calculated. Significant enrichments of the signals from the promoter-proximal  
564 regions compared to those from the gene-body regions were evaluated using Fisher's exact test  
565 with Bonferroni's correction. For *S. cerevisiae*, the regions from the observed TSS to downstream  
566 250bp (TSS to TSS+250 bp) were used as the promoter-proximal regions and those from TSS +  
567 250bp to the annotated transcription end site (TES) were used to calculate the gene-body signals.  
568 For mESCs, the regions from 100bp downstream to 200bp upstream of the observed PRO-seq  
569 peaks were used as the promoter-proximal regions, and gene-body signal was measured from the  
570 regions of 1kb downstream of the observed PRO-seq peak to the annotated TES. A gene was  
571 identified as being paused if the *P* value was lower than 0.01 and as being not paused if the *P*

572 value was higher than 0.99, as determined using combined replicates. A gene exhibiting  $P$  value  
573  $< 0.05$  or  $P$  value  $> 0.95$  for both biological replicates was further assigned as a high-confidence  
574 paused or high-confidence not paused gene, respectively. Pausing site was defined as the single-  
575 nucleotide of the maximum PRO-seq read within the promoter-proximal regions, as described in  
576 a recent study (16). If multiple sites with the maximum values were detected, the closest one to  
577 the TSS was selected.

578 All average profiles centered on the indicated point in this work were generated using a  
579 bootstrapped estimation. Briefly, 1,000 random gene sets were taken as each representing 10% of  
580 the total genes, and the median and confidence intervals of each averaged subsample were  
581 calculated. In the relevant figures, the thick line represents the median value and shaded regions  
582 indicate the 12.5<sup>th</sup> and 87.5<sup>th</sup> percentiles.

#### 583 **Analysis of publicly distributed ChIP-seq and MNase-seq data**

584 Raw sequencing reads of the indicated accession numbers were downloaded from NCBI GEO,  
585 unless otherwise noted. For MNase-seq, raw reads were uniquely mapped to the *S. cerevisiae*  
586 sacCer3 genome or to the *M. musculus* mm10 genome using Bowtie, which trimmed the 3' bases  
587 to 36 bp (if the raw reads were longer than 36 bp), allowed two mismatches, and restricted the  
588 maximum insert size to 200bp. BEDtools was used to covert the aligned BAM files to BED  
589 formats. The BED files were then processed by iNPS (63) to determine the nucleosome positions.  
590 Briefly, the “MainPeak” nucleosome that was the closest to either the observed TSS in *S.*  
591 *cerevisiae* or the observed PRO-seq peak in mESCs was assigned as the +1 nucleosome. The +1  
592 dyad was defined as the mid-point between the start and the end inflection, and 75 bp around the  
593 +1 dyad was referred to as the +1 nucleosome position. To discard false-positive nucleosome  
594 positions, nucleosomes that did not overlap the H3K4me3 ChIP-seq enrichment calculated from  
595 the existing data (34, 64) were discarded, as previously reported (16). The Gaussian smoothing  
596 values were used to process BigWig files for average profiles. For ChIP-seq, a combined genome



597 consisting of *S. cerevisiae* (sacCer3) and *S. pombe* (SpombeASMv2) was used, and unique reads  
598 from each genome were parsed for downstream analysis. MACS2 (65) was used to convert the  
599 aligned BAM files to bedGraph formats. For the spike-in control, the recorded coverage in the  
600 bedGraph file was normalized by the relative number of reads mapped to a *S. pombe* genome.  
601 The bedGraph files were converted to BigWig files by bedGraphToBigWig (62).

## 602 **Statistical analysis**

603 Statistical analyses were performed using R 3.6.3. In boxplots, whiskers represent 1.5 x  
604 interquartile range. *P* values for boxplot were calculated using stat\_compare\_means (method =  
605 "wilcox") function in ggpubr library. Symbols of ns, \*, \*\*, \*\*\*, \*\*\*\* represent  $P > 0.05$ ,  $\leq 0.05$ ,  
606  $\leq 0.01$ ,  $\leq 0.001$ ,  $\leq 0.0001$  respectively. *P* values for Venn diagram were calculated by  
607 hypergeometric distribution using phyper function in stats library.

608

## 609 **References and Notes**

- 610 1. L. Core, K. Adelman, Promoter-proximal pausing of RNA polymerase II: a nexus of gene  
611 regulation. *Genes Dev* **33**, 960-982 (2019).
- 612 2. T. Wada, T. Takagi, Y. Yamaguchi, A. Ferdous, T. Imai, S. Hirose, S. Sugimoto, K. Yano, G. A.  
613 Hartzog, F. Winston, S. Buratowski, H. Handa, DSIF, a novel transcription elongation factor that  
614 regulates RNA polymerase II processivity, is composed of human Spt4 and Spt5 homologs. *Genes*  
615 *Dev* **12**, 343-356 (1998).
- 616 3. Y. Yamaguchi, T. Takagi, T. Wada, K. Yano, A. Furuya, S. Sugimoto, J. Hasegawa, H. Handa, NELF,  
617 a multisubunit complex containing RD, cooperates with DSIF to repress RNA polymerase II  
618 elongation. *Cell* **97**, 41-51 (1999).
- 619 4. L. J. Core, J. J. Waterfall, J. T. Lis, Nascent RNA sequencing reveals widespread pausing and  
620 divergent initiation at human promoters. *Science* **322**, 1845-1848 (2008).
- 621 5. H. Kwak, N. J. Fuda, L. J. Core, J. T. Lis, Precise maps of RNA polymerase reveal how promoters  
622 direct initiation and pausing. *Science* **339**, 950-953 (2013).
- 623 6. D. B. Mahat, H. Kwak, G. T. Booth, I. H. Jonkers, C. G. Danko, R. K. Patel, C. T. Waters, K.  
624 Munson, L. J. Core, J. T. Lis, Base-pair-resolution genome-wide mapping of active RNA  
625 polymerases using precision nuclear run-on (PRO-seq). *Nat Protoc* **11**, 1455-1476 (2016).
- 626 7. L. S. Churchman, J. S. Weissman, Nascent transcript sequencing visualizes transcription at  
627 nucleotide resolution. *Nature* **469**, 368-373 (2011).
- 628 8. T. Nojima, T. Gomes, A. R. F. Grosso, H. Kimura, M. J. Dye, S. Dhir, M. Carmo-Fonseca, N. J.  
629 Proudfoot, Mammalian NET-Seq Reveals Genome-wide Nascent Transcription Coupled to RNA  
630 Processing. *Cell* **161**, 526-540 (2015).
- 631 9. L. J. Core, J. J. Waterfall, D. A. Gilchrist, D. C. Fargo, H. Kwak, K. Adelman, J. T. Lis, Defining  
632 the status of RNA polymerase at promoters. *Cell Rep* **2**, 1025-1035 (2012).
- 633 10. T. Henriques, D. A. Gilchrist, S. Nechaev, M. Bern, G. W. Muse, A. Burkholder, D. C. Fargo, K.

- 634 Adelman, Stable pausing by RNA polymerase II provides an opportunity to target and integrate  
635 regulatory signals. *Mol Cell* **52**, 517-528 (2013).
- 636 11. C. S. Maxwell, W. S. Kruesi, L. J. Core, N. Kurhanewicz, C. T. Waters, C. L. Lewarch, I.  
637 Antoshechkin, J. T. Lis, B. J. Meyer, L. R. Baugh, Pol II docking and pausing at growth and stress  
638 genes in *C. elegans*. *Cell Rep* **6**, 455-466 (2014).
- 639 12. G. T. Booth, I. X. Wang, V. G. Cheung, J. T. Lis, Divergence of a conserved elongation factor and  
640 transcription regulation in budding and fission yeast. *Genome Res* **26**, 799-811 (2016).
- 641 13. E. J. Grayhack, X. J. Yang, L. F. Lau, J. W. Roberts, Phage lambda gene Q antiterminator recognizes  
642 RNA polymerase near the promoter and accelerates it through a pause site. *Cell* **42**, 259-269 (1985).
- 643 14. S. S. Teves, C. M. Weber, S. Henikoff, Transcribing through the nucleosome. *Trends Biochem Sci*  
644 **39**, 577-586 (2014).
- 645 15. C. M. Weber, S. Ramachandran, S. Henikoff, Nucleosomes are context-specific, H2A.Z-modulated  
646 barriers to RNA polymerase. *Mol Cell* **53**, 819-830 (2014).
- 647 16. Y. Aoi, E. R. Smith, A. P. Shah, E. J. Rendleman, S. A. Marshall, A. R. Woodfin, F. X. Chen, R.  
648 Shiekhattar, A. Shilatifard, NELF Regulates a Promoter-Proximal Step Distinct from RNA Pol II  
649 Pause-Release. *Mol Cell* **78**, 261-274.e265 (2020).
- 650 17. P. J. Skene, A. E. Hernandez, M. Groudine, S. Henikoff, The nucleosomal barrier to promoter  
651 escape by RNA polymerase II is overcome by the chromatin remodeler Chd1. *Elife* **3**, e02042  
652 (2014).
- 653 18. J. Poli, S. M. Gasser, M. Papamichos-Chronakis, The INO80 remodeler in transcription,  
654 replication and repair. *Philos Trans R Soc Lond B Biol Sci* **372**, (2017).
- 655 19. M. Papamichos-Chronakis, S. Watanabe, O. J. Rando, C. L. Peterson, Global regulation of H2A.Z  
656 localization by the INO80 chromatin-remodeling enzyme is essential for genome integrity. *Cell*  
657 **144**, 200-213 (2011).
- 658 20. K. Yen, V. Vinayachandran, B. F. Pugh, SWR-C and INO80 chromatin remodelers recognize  
659 nucleosome-free regions near +1 nucleosomes. *Cell* **154**, 1246-1256 (2013).
- 660 21. M. Tramantano, L. Sun, C. Au, D. Labuz, Z. Liu, M. Chou, C. Shen, E. Luk, Constitutive turnover  
661 of histone H2A.Z at yeast promoters requires the preinitiation complex. *Elife* **5**, (2016).
- 662 22. C. Jeronimo, S. Watanabe, C. D. Kaplan, C. L. Peterson, F. Robert, The Histone Chaperones FACT  
663 and Spt6 Restrict H2A.Z from Intragenic Locations. *Mol Cell* **58**, 1113-1123 (2015).
- 664 23. M. Udugama, A. Sabri, B. Bartholomew, The INO80 ATP-dependent chromatin remodeling  
665 complex is a nucleosome spacing factor. *Mol Cell Biol* **31**, 662-673 (2011).
- 666 24. N. Krietenstein, M. Wal, S. Watanabe, B. Park, C. L. Peterson, B. F. Pugh, P. Korber, Genomic  
667 Nucleosome Organization Reconstituted with Pure Proteins. *Cell* **167**, 709-721.e712 (2016).
- 668 25. Y. Xue, S. K. Pradhan, F. Sun, C. Chronis, N. Tran, T. Su, C. Van, A. Vashisht, J. Wohlschlegel, C.  
669 L. Peterson, H. T. M. Timmers, S. K. Kurdistani, M. F. Carey, Mot1, Ino80C, and NC2 Function  
670 Coordinately to Regulate Pervasive Transcription in Yeast and Mammals. *Mol Cell* **67**, 594-  
671 607.e594 (2017).
- 672 26. E. S. Choi, Y. Cheon, K. Kang, D. Lee, The Ino80 complex mediates epigenetic centromere  
673 propagation via active removal of histone H3. *Nat Commun* **8**, 529 (2017).
- 674 27. A. Lafon, S. Taranum, F. Pietrocola, F. Dingli, D. Loew, S. Brahma, B. Bartholomew, M.  
675 Papamichos-Chronakis, INO80 Chromatin Remodeler Facilitates Release of RNA Polymerase II  
676 from Chromatin for Ubiquitin-Mediated Proteasomal Degradation. *Mol Cell* **60**, 784-796 (2015).
- 677 28. J. Poli, C. B. Gerhold, A. Tosi, N. Hustedt, A. Seeber, R. Sack, F. Herzog, P. Pasero, K. Shimada,  
678 K. P. Hopfner, S. M. Gasser, Mec1, INO80, and the PAF1 complex cooperate to limit transcription  
679 replication conflicts through RNAPII removal during replication stress. *Genes Dev* **30**, 337-354  
680 (2016).
- 681 29. A. Klein-Brill, D. Joseph-Strauss, A. Appleboim, N. Friedman, Dynamics of Chromatin and  
682 Transcription during Transient Depletion of the RSC Chromatin Remodeling Complex. *Cell Rep*  
683 **26**, 279-292.e275 (2019).

- 684 30. M. Morawska, H. D. Ulrich, An expanded tool kit for the auxin-inducible degron system in budding  
685 yeast. *Yeast* **30**, 341-351 (2013).
- 686 31. H. Kwak, J. T. Lis, Control of transcriptional elongation. *Annu Rev Genet* **47**, 483-508 (2013).
- 687 32. S. Kubik, M. J. Bruzzone, D. Challal, R. Dreos, S. Mattarocci, P. Bucher, D. Libri, D. Shore,  
688 Opposing chromatin remodelers control transcription initiation frequency and start site selection.  
689 *Nat Struct Mol Biol* **26**, 744-754 (2019).
- 690 33. S. Kubik, M. J. Bruzzone, D. Shore, Establishing nucleosome architecture and stability at  
691 promoters: Roles of pioneer transcription factors and the RSC chromatin remodeler. *Bioessays* **39**,  
692 (2017).
- 693 34. L. M. Soares, P. C. He, Y. Chun, H. Suh, T. Kim, S. Buratowski, Determinants of Histone H3K4  
694 Methylation Patterns. *Mol Cell* **68**, 773-785.e776 (2017).
- 695 35. M. Radman-Livaja, O. J. Rando, Nucleosome positioning: how is it established, and why does it  
696 matter? *Dev Biol* **339**, 258-266 (2010).
- 697 36. C. Jiang, B. F. Pugh, Nucleosome positioning and gene regulation: advances through genomics.  
698 *Nat Rev Genet* **10**, 161-172 (2009).
- 699 37. G. E. Crooks, G. Hon, J. M. Chandonia, S. E. Brenner, WebLogo: a sequence logo generator.  
700 *Genome Res* **14**, 1188-1190 (2004).
- 701 38. D. N. Bagchi, A. M. Battenhouse, D. Park, V. R. Iyer, The histone variant H2A.Z in yeast is almost  
702 exclusively incorporated into the +1 nucleosome in the direction of transcription. *Nucleic Acids Res*  
703 **48**, 157-170 (2020).
- 704 39. A. Tosi, C. Haas, F. Herzog, A. Gilmozzi, O. Berninghausen, C. Ungewickell, C. B. Gerhold, K.  
705 Lakomek, R. Aebersold, R. Beckmann, K. P. Hopfner, Structure and subunit topology of the INO80  
706 chromatin remodeler and its nucleosome complex. *Cell* **154**, 1207-1219 (2013).
- 707 40. W. Yao, S. L. Beckwith, T. Zheng, T. Young, V. T. Dinh, A. Ranjan, A. J. Morrison, Assembly of  
708 the Arp5 (Actin-related Protein) Subunit Involved in Distinct INO80 Chromatin Remodeling  
709 Activities. *J Biol Chem* **290**, 25700-25709 (2015).
- 710 41. W. Yao, D. A. King, S. L. Beckwith, G. J. Gowans, K. Yen, C. Zhou, A. J. Morrison, The INO80  
711 Complex Requires the Arp5-Ies6 Subcomplex for Chromatin Remodeling and Metabolic  
712 Regulation. *Mol Cell Biol* **36**, 979-991 (2016).
- 713 42. S. M. Vos, L. Farnung, M. Boehning, C. Wigge, A. Linden, H. Urlaub, P. Cramer, Structure of  
714 activated transcription complex Pol II-DSIF-PAF-SPT6. *Nature* **560**, 607-612 (2018).
- 715 43. F. X. Chen, A. R. Woodfin, A. Gardini, R. A. Rickels, S. A. Marshall, E. R. Smith, R. Shiekhattar,  
716 A. Shilatifard, PAF1, a Molecular Regulator of Promoter-Proximal Pausing by RNA Polymerase  
717 II. *Cell* **162**, 1003-1015 (2015).
- 718 44. L. Hou, Y. Wang, Y. Liu, N. Zhang, I. Shamovsky, E. Nudler, B. Tian, B. D. Dynlacht, Paf1C  
719 regulates RNA polymerase II progression by modulating elongation rate. *Proc Natl Acad Sci U S*  
720 *A* **116**, 14583-14592 (2019).
- 721 45. H. Ehara, T. Kujirai, Y. Fujino, M. Shirouzu, H. Kurumizaka, S. I. Sekine, Structural insight into  
722 nucleosome transcription by RNA polymerase II with elongation factors. *Science* **363**, 744-747  
723 (2019).
- 724 46. S. Heinz, C. Benner, N. Spann, E. Bertolino, Y. C. Lin, P. Laslo, J. X. Cheng, C. Murre, H. Singh,  
725 C. K. Glass, Simple combinations of lineage-determining transcription factors prime cis-regulatory  
726 elements required for macrophage and B cell identities. *Mol Cell* **38**, 576-589 (2010).
- 727 47. S. Wu, Y. Shi, P. Mulligan, F. Gay, J. Landry, H. Liu, J. Lu, H. H. Qi, W. Wang, J. A. Nickoloff, C.  
728 Wu, Y. Shi, A YY1-INO80 complex regulates genomic stability through homologous  
729 recombination-based repair. *Nat Struct Mol Biol* **14**, 1165-1172 (2007).
- 730 48. X. Shen, G. Mizuguchi, A. Hamiche, C. Wu, A chromatin remodelling complex involved in  
731 transcription and DNA processing. *Nature* **406**, 541-544 (2000).
- 732 49. B. Lai, W. Gao, K. Cui, W. Xie, Q. Tang, W. Jin, G. Hu, B. Ni, K. Zhao, Principles of nucleosome  
733 organization revealed by single-cell micrococcal nuclease sequencing. *Nature* **562**, 281-285 (2018).

- 734 50. J. Li, Y. Liu, H. S. Rhee, S. K. Ghosh, L. Bai, B. F. Pugh, D. S. Gilmour, Kinetic competition  
735 between elongation rate and binding of NELF controls promoter-proximal pausing. *Mol Cell* **50**,  
736 711-722 (2013).
- 737 51. T. Narita, Y. Yamaguchi, K. Yano, S. Sugimoto, S. Chanarat, T. Wada, D. K. Kim, J. Hasegawa, M.  
738 Omori, N. Inukai, M. Endoh, T. Yamada, H. Handa, Human transcription elongation factor NELF:  
739 identification of novel subunits and reconstitution of the functionally active complex. *Mol Cell Biol*  
740 **23**, 1863-1873 (2003).
- 741 52. Y. Yamaguchi, H. Shibata, H. Handa, Transcription elongation factors DSIF and NELF: promoter-  
742 proximal pausing and beyond. *Biochim Biophys Acta* **1829**, 98-104 (2013).
- 743 53. S. Jimeno-González, M. Ceballos-Chávez, J. C. Reyes, A positioned +1 nucleosome enhances  
744 promoter-proximal pausing. *Nucleic Acids Res* **43**, 3068-3078 (2015).
- 745 54. T. Kujirai, H. Ehara, Y. Fujino, M. Shirouzu, S. I. Sekine, H. Kurumizaka, Structural basis of the  
746 nucleosome transition during RNA polymerase II passage. *Science* **362**, 595-598 (2018).
- 747 55. J. Fitz, T. Neumann, R. Pavri, Regulation of RNA polymerase II processivity by Spt5 is restricted  
748 to a narrow window during elongation. *Embo j* **37**, (2018).
- 749 56. G. Moyle-Heyrman, T. Zaichuk, L. Xi, Q. Zhang, O. C. Uhlenbeck, R. Holmgren, J. Widom, J. P.  
750 Wang, Chemical map of *Schizosaccharomyces pombe* reveals species-specific features in  
751 nucleosome positioning. *Proc Natl Acad Sci USA* **110**, 20158-20163 (2013).
- 752 57. A. B. Lantermann, T. Straub, A. Strålfors, G. C. Yuan, K. Ekwall, P. Korber, *Schizosaccharomyces*  
753 *pombe* genome-wide nucleosome mapping reveals positioning mechanisms distinct from those of  
754 *Saccharomyces cerevisiae*. *Nat Struct Mol Biol* **17**, 251-257 (2010).
- 755 58. G. T. Booth, P. K. Parua, M. Sansó, R. P. Fisher, J. T. Lis, Cdk9 regulates a promoter-proximal  
756 checkpoint to modulate RNA polymerase II elongation rate in fission yeast. *Nat Commun* **9**, 543  
757 (2018).
- 758 59. E. Kopylova, L. Noé, H. Touzet, SortMeRNA: fast and accurate filtering of ribosomal RNAs in  
759 metatranscriptomic data. *Bioinformatics* **28**, 3211-3217 (2012).
- 760 60. B. Langmead, C. Trapnell, M. Pop, S. L. Salzberg, Ultrafast and memory-efficient alignment of  
761 short DNA sequences to the human genome. *Genome Biol* **10**, R25 (2009).
- 762 61. A. R. Quinlan, I. M. Hall, BEDTools: a flexible suite of utilities for comparing genomic features.  
763 *Bioinformatics* **26**, 841-842 (2010).
- 764 62. W. J. Kent, A. S. Zweig, G. Barber, A. S. Hinrichs, D. Karolchik, BigWig and BigBed: enabling  
765 browsing of large distributed datasets. *Bioinformatics* **26**, 2204-2207 (2010).
- 766 63. W. Chen, Y. Liu, S. Zhu, C. D. Green, G. Wei, J. D. Han, Improved nucleosome-positioning  
767 algorithm iNPS for accurate nucleosome positioning from sequencing data. *Nat Commun* **5**, 4909  
768 (2014).
- 769 64. H. Marks, T. Kalkan, R. Menafra, S. Denissov, K. Jones, H. Hofemeister, J. Nichols, A. Kranz, A.  
770 F. Stewart, A. Smith, H. G. Stunnenberg, The transcriptional and epigenomic foundations of ground  
771 state pluripotency. *Cell* **149**, 590-604 (2012).
- 772 65. Y. Zhang, T. Liu, C. A. Meyer, J. Eeckhoutte, D. S. Johnson, B. E. Bernstein, C. Nusbaum, R. M.  
773 Myers, M. Brown, W. Li, X. S. Liu, Model-based analysis of ChIP-Seq (MACS). *Genome Biol* **9**,  
774 R137 (2008).

775

## 776 Acknowledgments

777 **General:** We would like to thank Nir Friedman for providing the AID strain. We acknowledge

778 Gregory T. Booth and John T. Lis for making publicly available the custom script for PRO-seq

779 analysis in GitHub. We also thank the Lee lab members, H. Jo for obtaining the AID strain from  
780 N. Friedman, H. Yang for assistance with mESC culture and Y. Chun for critically reading the  
781 paper. **Funding:** This work was supported by a National Research Foundation (NRF) of Korea  
782 Grant funded by the Ministry of Science and ICT (MSIT) (2018R1A5A1024261, SRC), and the  
783 Collaborative Genome Program for Fostering New Post-Genome Industry of the NRF funded by  
784 the MSIT (2018M3C9A6065070). **Author Contributions:** Y.C. and D.L. conceived the study  
785 and designed the experiments. Y.C. performed all the PRO-seq experiments and computational  
786 analysis in this study. Y.C. and D.L. wrote the paper. S.H. conducted the mESC cultures and  
787 siRNA transfections. T.K. supported the computational analysis. **Competing interests:** We have  
788 no conflicts of interest to disclose.

789

790

791

792

793

794

795

796

797

798

799

800

801

802

803 **Figures and Tables**

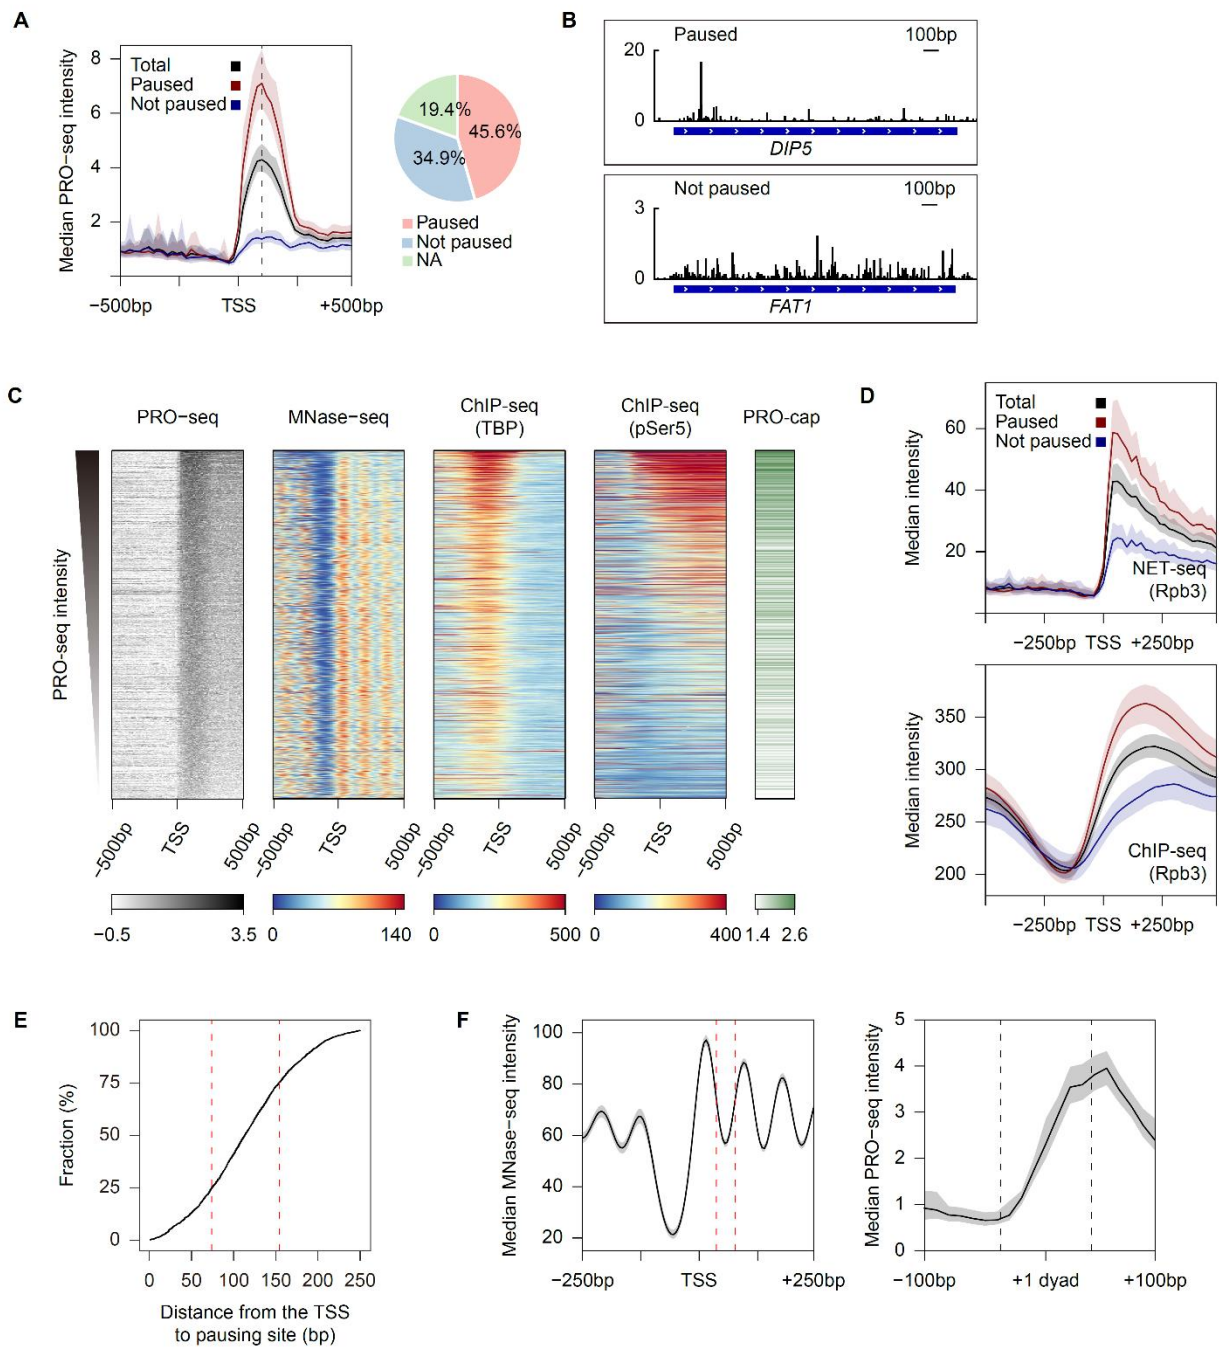

804

805

**Fig. 1. PRO-seq reveals a non-uniform distribution of transcription elongation genome-wide**

806

**in *S. cerevisiae* resembling promoter-proximal pausing in metazoans.**

807 (A) Average profile showing the median PRO-seq intensities of paused and not paused genes. Pie  
808 chart indicates the percentage of paused (N = 2,599) and not paused (N = 1,990) genes among the  
809 total filtered protein-coding (N = 5,315) genes. NA indicate genes which were not classified as  
810 either being paused or not paused. (B) Genome browser view of PRO-seq signals for  
811 representative paused or not paused genes. (C) Heatmaps showing PRO-seq, PRO-cap, existing  
812 MNase-seq (GSM3304635), TBP ChIP-seq (GSM3452564) and pSer5 ChIP-seq (GSM3452562)  
813 signals. Genes were sorted by the PRO-seq signals at their promoter-proximal regions. The PRO-  
814 cap intensity reflected read counts within 250bp upstream and downstream of the TSS. (D)  
815 Average Rpb3 NET-seq (GSM617027) and ChIP-seq (GSM2813906) profiles centered on the  
816 TSS. Processed sequencing files downloaded from the NCBI Gene Expression Omnibus (GEO)  
817 were used for this analysis. (E) Cumulative curve analyzing the distance from the TSS to pausing  
818 site for paused genes. The red dotted lines represent the 25<sup>th</sup> (74 bp) and 75<sup>th</sup> (154 bp) percentiles.  
819 (F) Average profiles showing median MNase-seq intensity (GSM3304635) at the TSS (Left) and  
820 the median PRO-seq intensity at the +1 nucleosome dyad (Right). The +1 dyad was defined by  
821 the improved nucleosome-positioning algorithm, iNPS from an existing MNase-seq data  
822 (GSM3304635) (63). The two red dotted lines represent the 25<sup>th</sup> (74 bp) and 75<sup>th</sup> (154 bp)  
823 percentiles of the pausing site (Left) and the two black dotted lines represent the position of the  
824 +1 nucleosome (Right; 75 bp upstream and downstream of the +1 dyad).

825 All PRO-seq data were generated from auxin-untreated Ino80-AID cells, and combined biological  
826 replicates were used. For average profiles, medians reflect either the 20-bp bin (PRO-seq) or the  
827 10-bp bin (MNase-seq). For heatmaps, signals reflect the 10-bp bin around the indicated site. The  
828 PRO-seq, PRO-cap, and ChIP-seq intensities are presented in spike-in-normalized reads per  
829 million. MNase-seq data are presented in Gaussian smoothing-normalized reads per million.

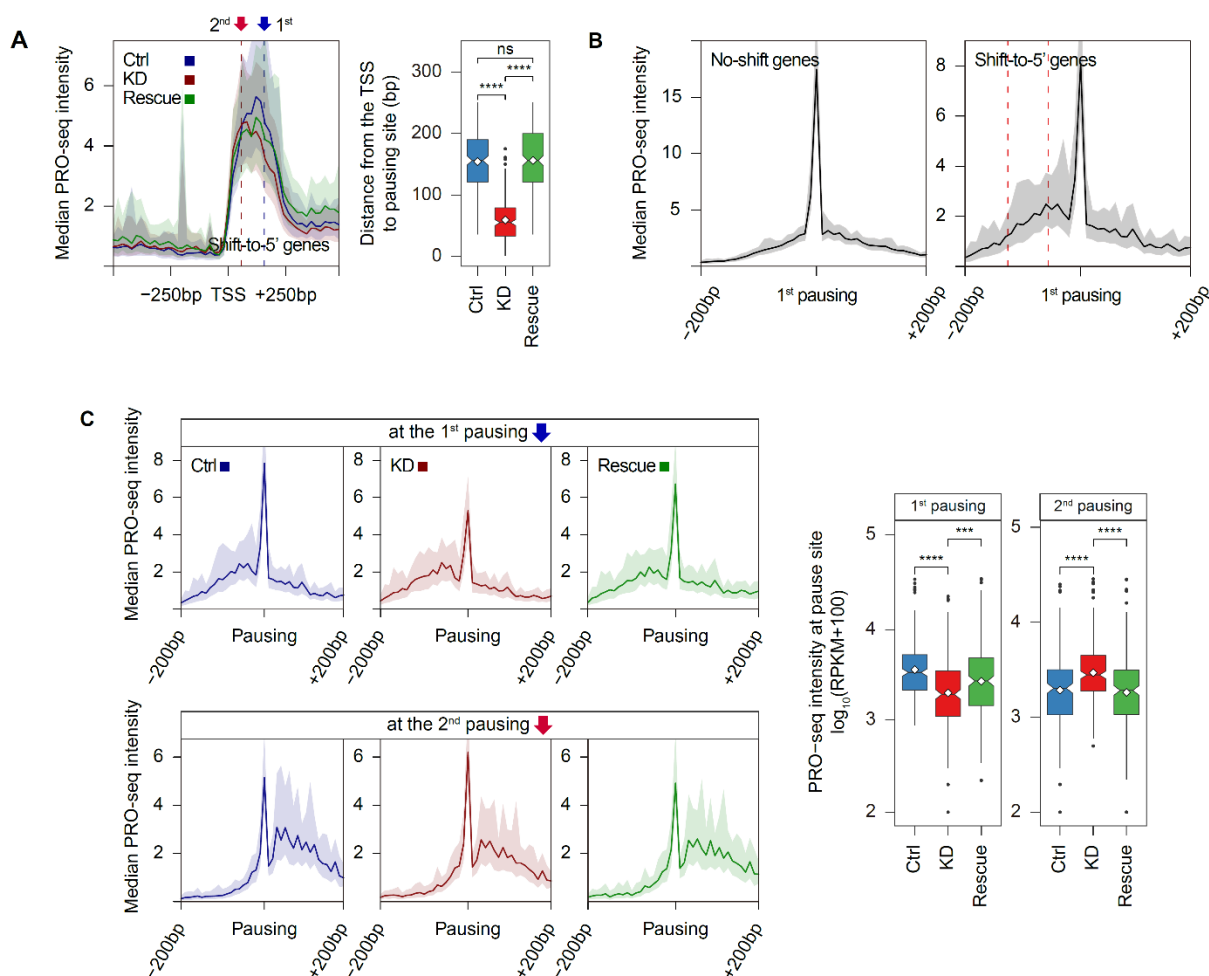

830

831 **Fig. 2. Pausing-site determination by Ino80p occurs at genes with alternative pausing sites.**

832 (A) Average profile indicating median PRO-seq intensities in Ino80-AID cells treated with auxin

833 for 0 hr (Ctrl) and 3 hrs (KD) and rescued for 3 hrs after auxin removal (Rescue) for shift-to-5'

834 genes (N = 221). The arrows and below dotted lines represent the median of the 1<sup>st</sup> (blue, 55bp)

835 and 2<sup>nd</sup> (red, 156bp) pausing sites. Medians reflect 20-bp bins. Boxplot shows the distance

836 between the TSS and pausing site. (B) Average profiles representing median PRO-seq intensities

837 in the control sample for either no-shift genes (N = 1,211) or shift-to-5' genes (N = 221). The two

838 red dotted lines (Right) represent the 25<sup>th</sup> (-56 bp) and 75<sup>th</sup> (-126 bp) percentiles of the 2<sup>nd</sup> pausing

839 site relative to the 1<sup>st</sup> pausing site. Medians reflect 10-bp bins. (C) Average profiles displaying

840 median PRO-seq intensities around either the 1<sup>st</sup> or the 2<sup>nd</sup> pausing site. Medians reflect 10-bp



841 bins. Boxplot shows the PRO-seq intensity at the indicated single nucleotide in  
 842  $\log_{10}(\text{RPKM}+100)$ .  
 843 All data was generated using combined biological replicates. PRO-seq intensity was calculated  
 844 using spike-in-normalized reads per million. Asterisks represent statistically significant  
 845 differences, as calculated using the Wilcoxon test.  
 846

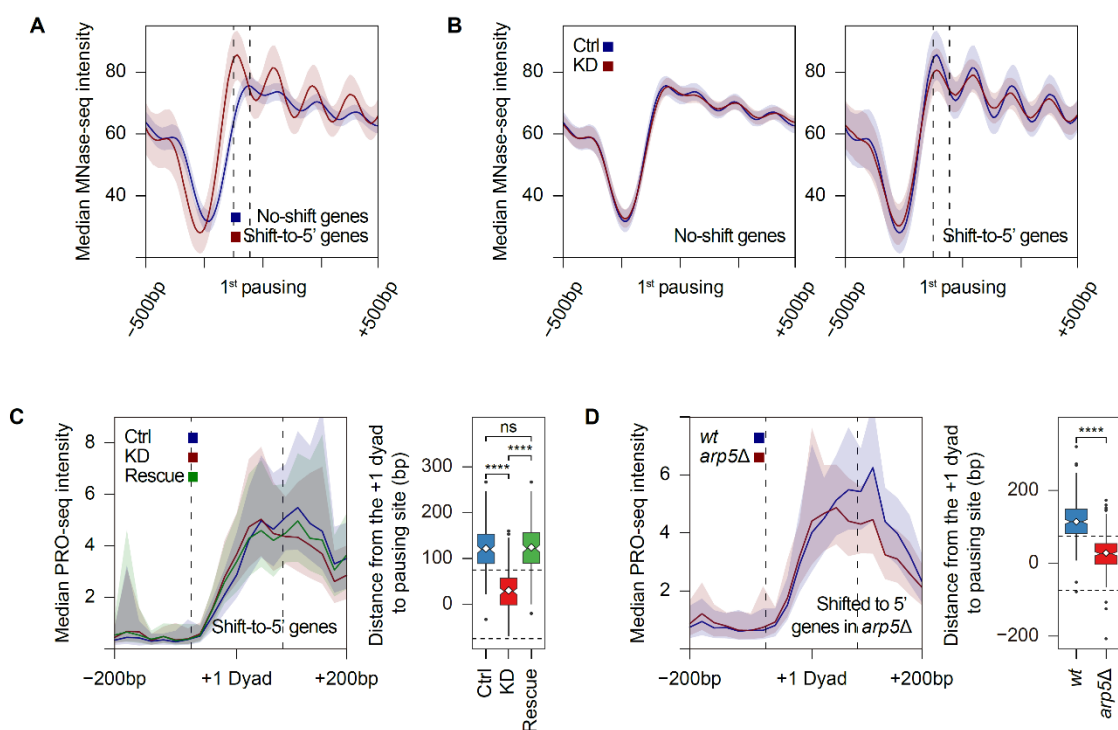

847  
 848 **Fig. 3. Chromatin remodeling activity of Ino80p in nucleosome positioning around the 1<sup>st</sup>**  
 849 **pausing site is critical for proper localization of pausing.**  
 850 (A) Average profiles of median MNase-seq intensities in control samples (GSM3304635) for no-  
 851 shift genes (N = 1,211) and shift-to-5' genes (N = 221) centered on the 1<sup>st</sup> pausing site. (B)  
 852 Average profiles of median MNase-seq intensities in control sample (GSM3304635) and Ino80p-  
 853 KD sample (GSM3304637) for no-shift genes (Left) and shift-to-5' genes (Right) at the 1<sup>st</sup>  
 854 pausing site. For Fig. 3, A and B, the two dotted lines indicate the 25<sup>th</sup> (-56 bp) and 75<sup>th</sup> (-126 bp)

855 percentiles of the 2<sup>nd</sup> pausing site relative to the 1<sup>st</sup> pausing site. (C and D) Average profiles of  
 856 median PRO-seq intensity for the indicated samples around the +1 dyad (defined in Fig. 1F) and  
 857 boxplots of the distance from the +1 dyad to pausing site. Note that only nucleosomes overlapped  
 858 with H3K4me3 ChIP-seq enrichment (GSM2507874) were used, in an effort to exclude false-  
 859 positive nucleosomes. For (C), shift-to-5' genes upon Ino80p-KD (N = 160) were used for  
 860 analyses. For (D), pausing site shifted toward 5' genes in *arp5*Δ (N = 264) were used for  
 861 analyses. The two dotted lines in profiles and boxplots represented the position of the +1  
 862 nucleosome (75 bp upstream and downstream of +1 dyad).  
 863 All PRO-seq data were generated using combined biological replicates. PRO-seq and MNase-seq  
 864 intensity were calculated using spike-in-normalized reads per million and Gaussian smoothing-  
 865 normalized reads per million, respectively. For average profiles, medians reflect either the 20-bp  
 866 bin (PRO-seq) or the 10-bp bin (MNase-seq). Asterisks represented statistically significant  
 867 differences, as calculated using the Wilcoxon test.

868

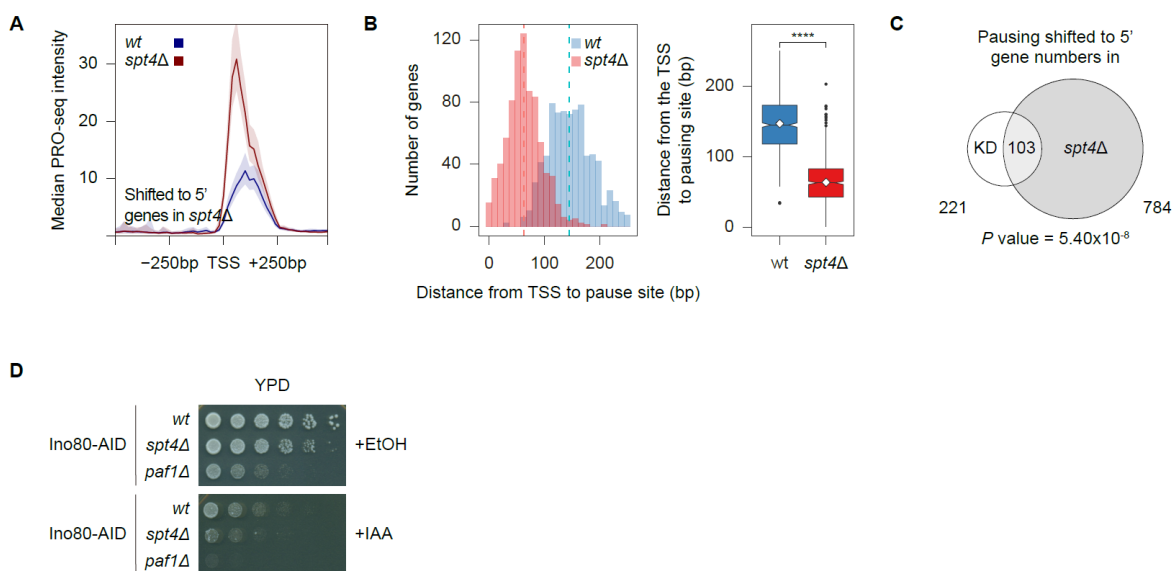

869

870 **Fig. 4. Loss of the conserved pausing factor Spt4p shifts pausing upstream in a manner**  
871 **similar to Ino80p knockdown.**

872 (A) Average profiles representing median PRO-seq intensities of *wt* and *spt4Δ*. Medians reflect  
873 20-bp bins. (B) Histograms and boxplots demonstrating the distance from the TSS to pausing site  
874 in *wt* and *spt4Δ*. Asterisks represent statistically significant differences, as calculated using the  
875 Wilcoxon test. For (A) and (B), genes whose pausing sites were shifted toward 5' (> 30bp) in  
876 *spt4Δ* (N = 784) were used for analyses. (C) Venn diagram depict overlap between shift-to-5'  
877 genes upon Ino80p-KD (N = 221) and genes showing an upstream shift (> 30bp) of RNAPII  
878 pausing in *spt4Δ* (N = 784). *P* value was calculated using the hypergeometric distribution. (D)  
879 Spotting assays analyzing genetic interactions between *INO80* and *SPT4* or *PAF1*. Cells were  
880 spotted onto YPD plates containing either ethanol or auxin (0.5mM) with 5-fold serial dilutions  
881 and incubated at 30°C.

882 All PRO-seq data were generated using combined biological replicates. PRO-seq intensities were  
883 calculated using spike-in-normalized reads per million.

884

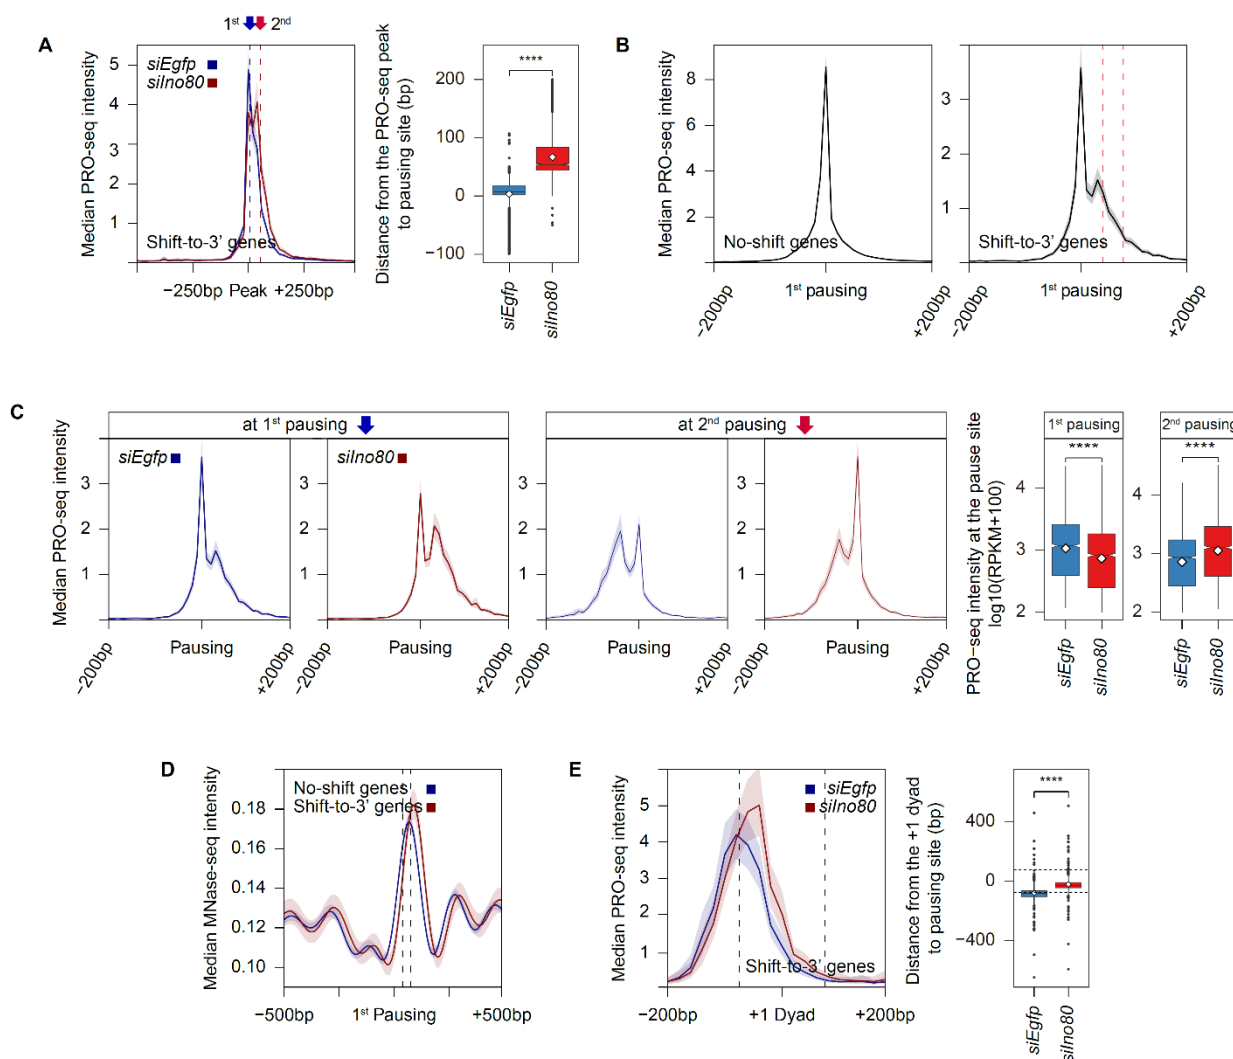

885  
 886 **Fig. 5. The ability of Ino80 to regulate RNAPII pausing site is conserved in mESCs.**  
 887 (A) Average profiles representing median PRO-seq intensities in mESCs treated with either  
 888 *siEgfp* or *siIno80* for 48 hrs at shift-to-3' genes (N = 2,324) around the PRO-seq peak. Medians  
 889 reflect 20-bp bins. The arrows and below dotted lines represent the median of the 1<sup>st</sup> (blue, 7bp)  
 890 and 2<sup>nd</sup> (red, 54bp) pausing sites. Boxplot showed the distance between pausing site and the PRO-seq  
 891 peak. (B) Average profiles of median PRO-seq intensities in mESCs treated with *siEgfp* at  
 892 shift-to-3' genes (N = 2,324) or no-shift genes (N = 16,903). Medians reflect 10-bp bins. The two  
 893 red dotted lines (Right) represent the 25<sup>th</sup> (39bp) and 75<sup>th</sup> (76bp) percentiles of the 2<sup>nd</sup> pausing site

894 relative to the 1<sup>st</sup> pausing site. (C) Average profiles displaying median PRO-seq intensities  
895 around the 1<sup>st</sup> or 2<sup>nd</sup> pausing site. Medians reflect 10-bp bins. Boxplots showed the PRO-seq  
896 intensities at the indicated single nucleotides in  $\log_{10}(\text{RPKM}+100)$ . (D) Average profiles of  
897 median MNase-seq intensities obtained from untreated mESCs (GSM2906312 and  
898 GSM2906313) for no-shift genes and shift-to-3' genes at the 1<sup>st</sup> pausing site. The two black  
899 dotted lines indicate the 25<sup>th</sup> (39bp) and 75<sup>th</sup> (76bp) percentiles of the 2<sup>nd</sup> pausing site relative to  
900 the 1<sup>st</sup> pausing site. Medians reflect 10-bp bins. (E) Average profiles of median PRO-seq  
901 intensities around the +1 dyad, which was determined by MNase-seq used in Fig. 5D, for shift-to-  
902 3' genes. The two dotted lines represent the position of the +1 nucleosome (75 bp upstream and  
903 downstream of the +1 dyad). Only nucleosomes overlapped with H3K4me3 enrichment  
904 calculated from an existing ChIP-seq data (GSM590111) (64) were used, in an effort to exclude  
905 false-positive nucleosomes (N = 629). Boxplot indicates the distance from the +1 dyad to pausing  
906 site. Asterisks represent statistically significant differences, as calculated using the Wilcoxon test.  
907 All PRO-seq data were generated using combined biological replicates. PRO-seq and MNase-seq  
908 intensities were calculated using spike-in-normalized reads per million and Gaussian smoothing-  
909 normalized reads per million, respectively.  
910

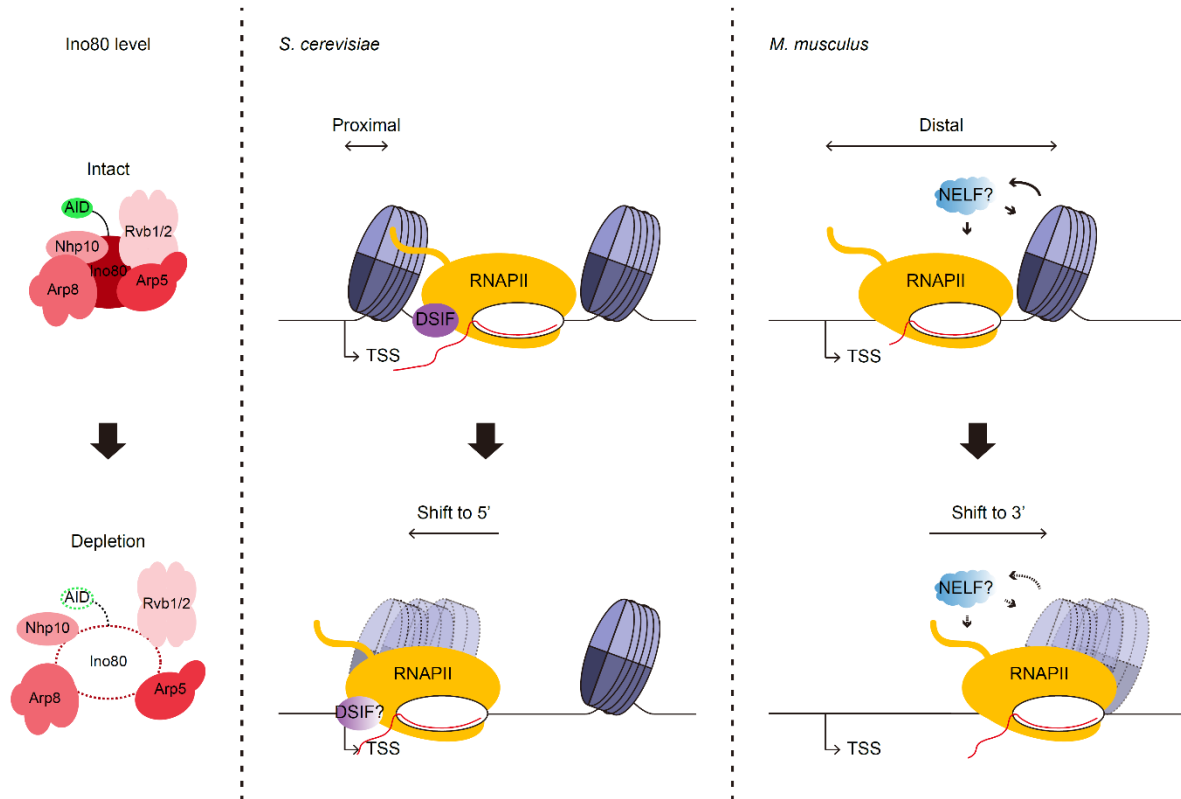

911

912

**Fig. 6. Model of the function of Ino80 in mediating alternative pausing site determination.**

913

Model depicts a conserved regulatory role of Ino80 in proper localization of RNAPII pausing

914

through its activity to modulate the +1 nucleosome in budding yeast and mESCs. See Discussion

915

for details.

916

917

918

919

920

921

922

923

924 **Supplementary Materials**

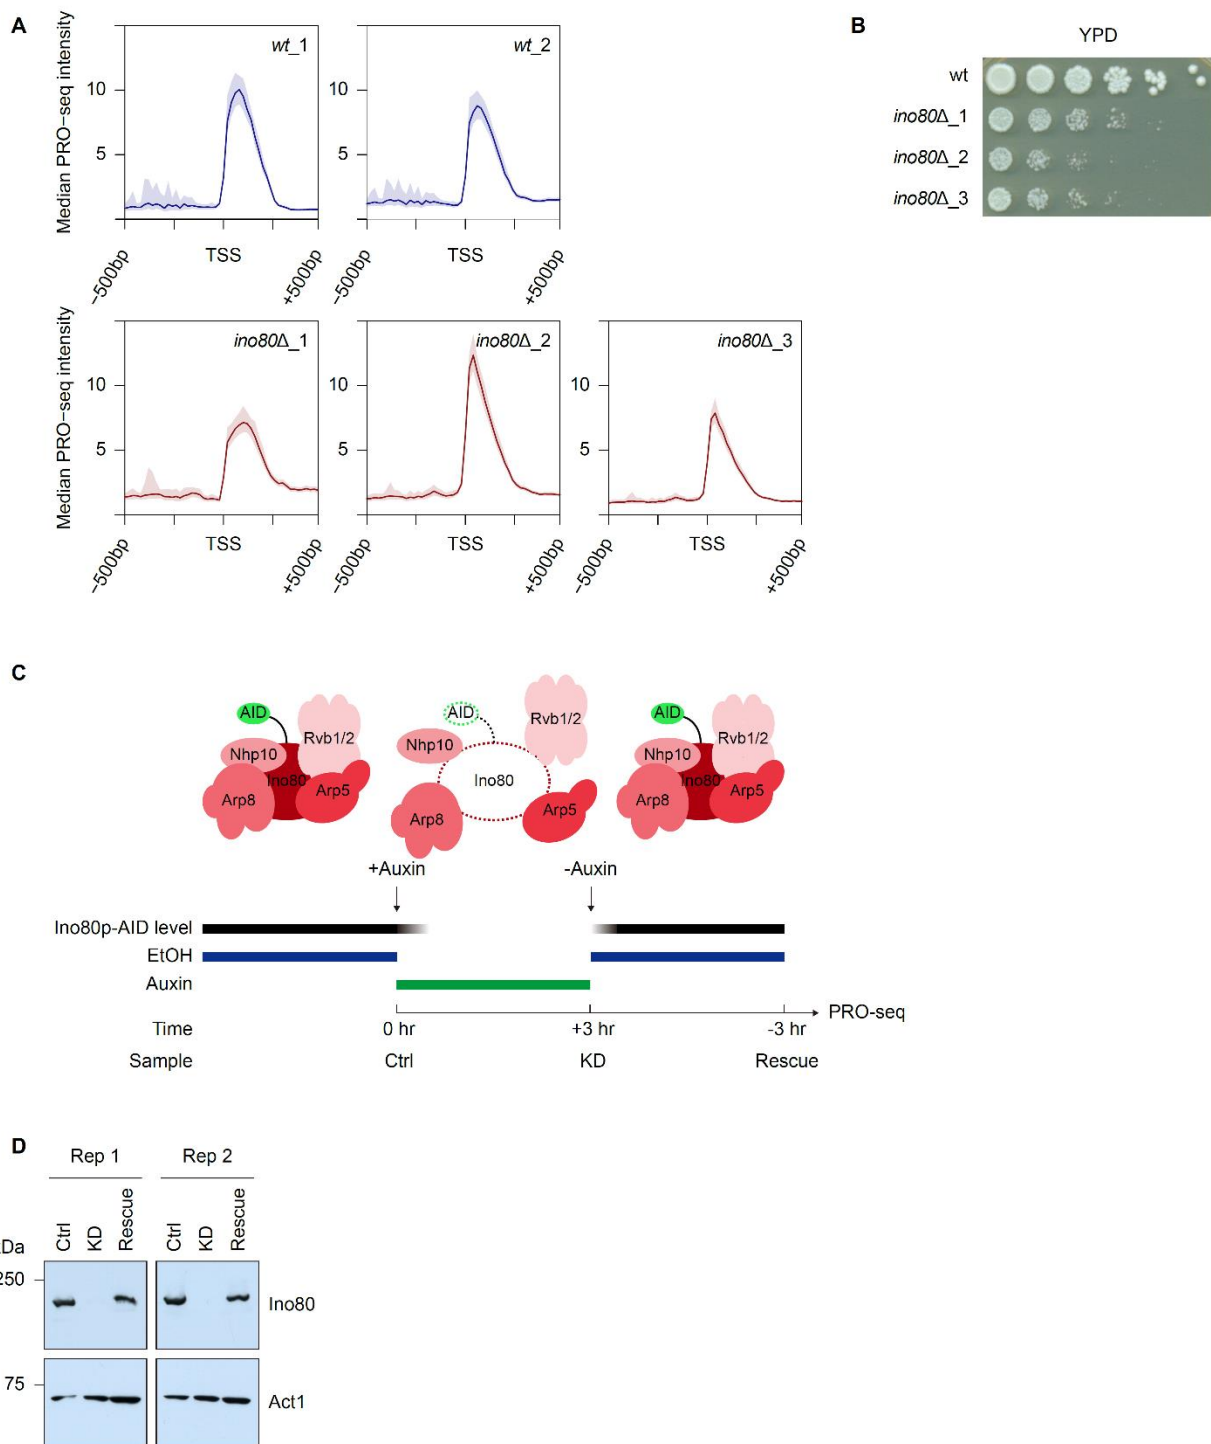

925

926

927

**fig. S1. Loss of Ino80p causes variation in fitness and the promoter-proximal PRO-seq pattern.**

928           **(A)** Average profiles indicating the median PRO-seq intensities (Spike-in-normalized reads per  
929           million) in *wt* and *ino80Δ*. Medians reflect 20-bp bins. **(B)** Spotting assays assessing growth  
930           variation in *ino80Δ* cells of the same batch used to generate the triplicate PRO-seq data presented  
931           in fig. S1A. Cells were spotted onto YPD plates with 5-fold serial dilutions and incubated at  
932           30°C. **(C)** Schematic illustration of experimental outline. Ino80-AID cells (29) were grown to  
933           mid-log phase in YPD containing ethanol (Ctrl). The ethanol was washed away and the cells were  
934           incubated with auxin (0.5mM) for 3 hrs (KD). The auxin was washed away and the cells were  
935           incubated without auxin for additional 3 hrs (Rescue). PRO-seq was performed at each indicated  
936           time point. **(D)** Western blot of whole-cell lysates from Ino80-AID cells under the Ctrl, KD, and  
937           Rescue conditions showed that Ino80p is almost completely degraded after 3 hrs of auxin  
938           incubation and restored after 3 hrs of auxin withdrawal. Western blot analysis was performed  
939           against Act1p served as a loading control.

940



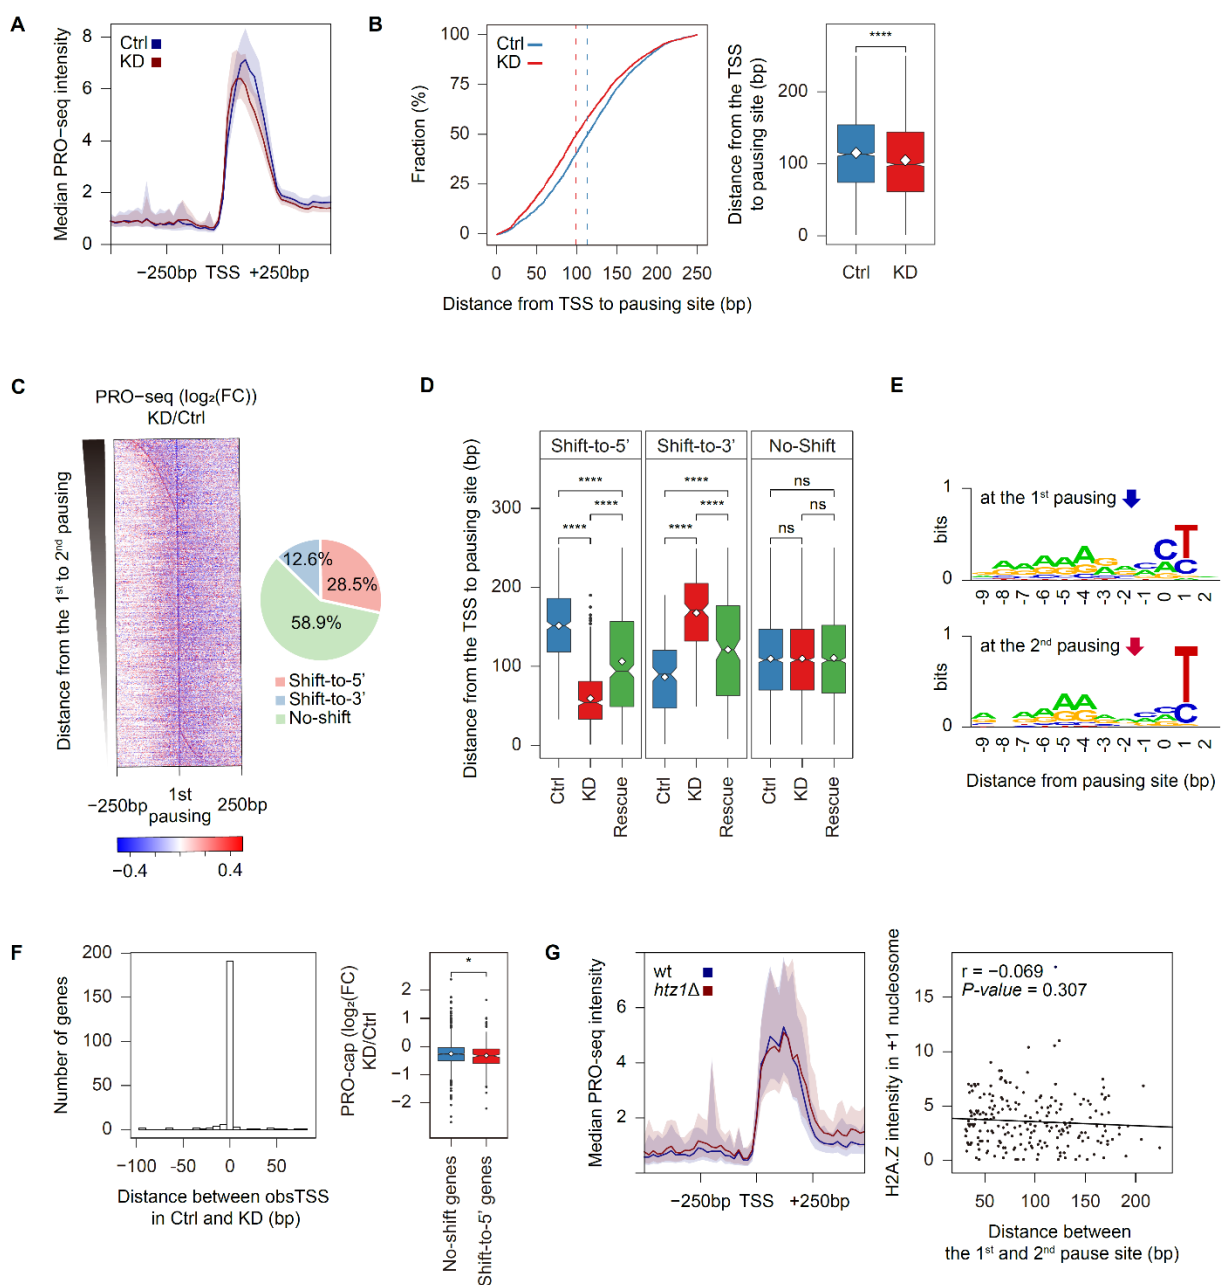

941  
 942 **fig. S2. Ino80p knockdown transits the RNAPII pausing from the 1<sup>st</sup> to the 2<sup>nd</sup> pausing site**  
 943 **and it is independent of both TSS usage and H2A.Z<sup>Htz1</sup>.**  
 944 (A) Average profile indicating median PRO-seq intensities in Ino80-AID cells treated with auxin  
 945 for 0 hr (Ctrl) and 3 hrs (KD), as assessed at the genes defined as being high-confidence paused  
 946 (N = 2,599). (B) Cumulative curve and boxplot demonstrate the distance from the TSS to pausing

947 site for paused genes in the control and knockdown conditions. The dotted lines represent the  
948 median value (113bp for Ctrl and 99bp for KD). (C) Heatmap representing the PRO-seq signal  
949 upon Ino80p-KD as a  $\log_2$  fold change relative to the control sample at the 1<sup>st</sup> pausing site. Genes  
950 were sorted by the distance to the 2<sup>nd</sup> pausing site. Pie chart shows the percentage of genes whose  
951 pausing site was shifted toward 5' (N = 742), toward 3' (N = 327), or not shifted (N = 1,530)  
952 among total paused genes (N = 2,599) upon Ino80p-KD. (D) Boxplot indicating the distance from  
953 the TSS to pausing site for genes shifted more than 30bp toward upstream (N = 442) or  
954 downstream (N = 178), or for not shifted genes (N = 1,530). Upon rescue of Ino80p, the pausing  
955 site was restored to the 1<sup>st</sup> pausing site in both types of shifted genes. (E) Sequence logos around  
956 either the 1<sup>st</sup> or the 2<sup>nd</sup> pausing site were generated using WebLogo (37). (F) Histogram analyzing  
957 the distance between the observed TSS for shift-to-5' genes under control and Ino80p-KD  
958 conditions (Left). A large fraction of genes (189 out of 221) showed no change in their major  
959 initiation site upon knockdown. Boxplot demonstrates the  $\log_2$  fold change in the PRO-cap signal  
960 100bp around the TSS (in RPKM) upon Ino80p-KD relative to control for shift-to-5' genes or no-  
961 shift genes (Right). (G) Average profiles indicating the median PRO-seq intensities in *wt*  
962 (BY4741) and *htz1* $\Delta$  cells (Left). Scatter plot displays the correlation (as Pearson's *r*) between the  
963 H2A.Z<sup>Htz1</sup> intensity (IP/input in reads per million) at the +1 nucleosome and the distance of the  
964 pausing site shift (Right). For analysis of H2A.Z intensity, we used an existing MNase-ChIP-seq  
965 data set (GSM2790633, GSM2790634, GSM2790635 and GSM2790636).

966 All PRO-seq data were generated using combined biological replicates. The PRO-seq and PRO-  
967 cap intensities were calculated using spike-in-normalized reads per million. For average profiles,  
968 medians reflect 20-bp bins. Asterisks represent statistically significant differences, as calculated  
969 using the Wilcoxon test.

970

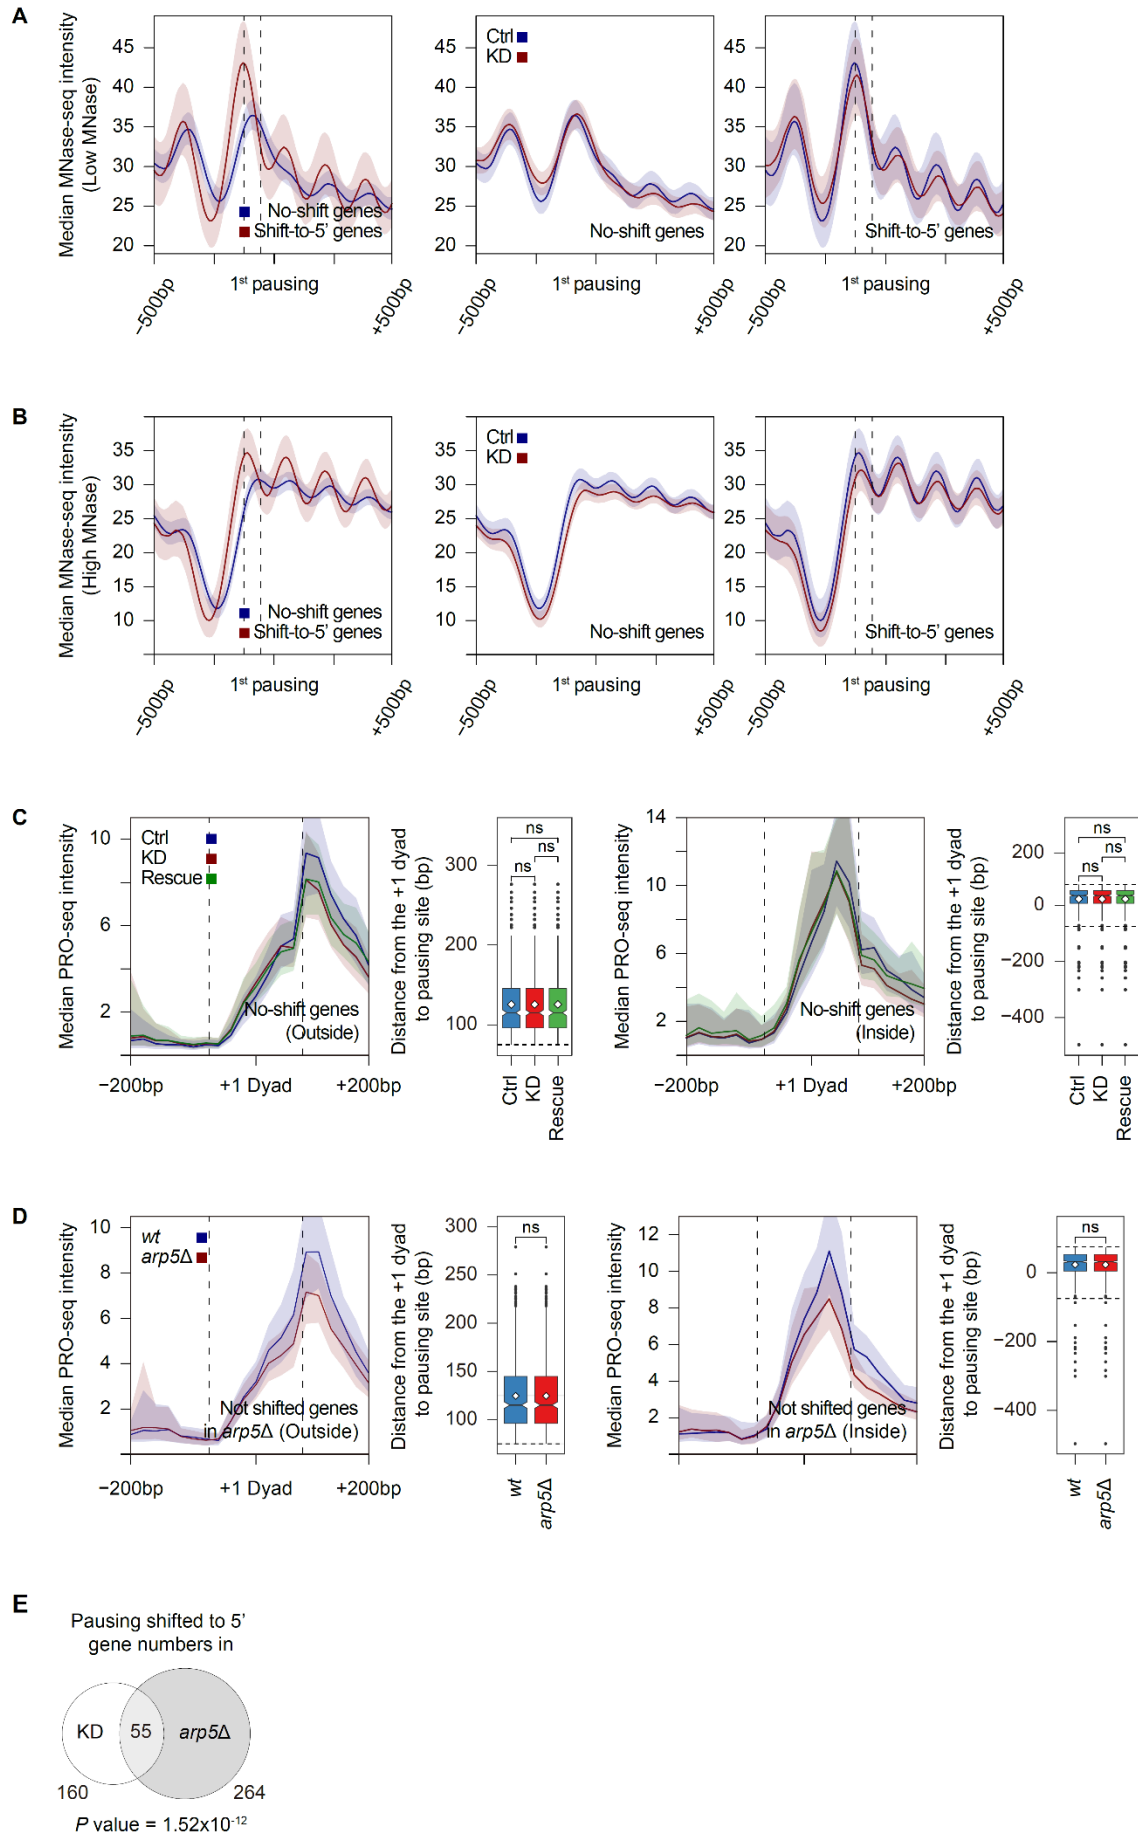

972 **fig. S3. MNase-seq analyses at the pausing site and PRO-seq analyses at the +1 dyad.**

973 (A) Average profiles of median MNase-seq intensities in control samples (GSM3177776) for no-

974 shift genes (N = 1,211) and shift-to-5' genes (N = 221) centered on the 1<sup>st</sup> pausing site (Left).

975 Average profiles of median MNase-seq intensities in control sample (GSM3177776) and Ino80p-

976 KD sample (GSM3177778) for no-shift genes (Middle) and shift-to-5' genes (Right) at the 1<sup>st</sup>

977 pausing site. (B) Same as (A). Instead, GSM3177777 was used as control samples and

978 GSM3177779 was used as Ino80p-KD samples. For fig. S3, A and B, the two dotted lines

979 indicate the 25th (-56 bp) and 75th (-126 bp) percentiles of the 2<sup>nd</sup> pausing site relative to the 1<sup>st</sup>

980 pausing site. (C and D) Average profiles of median PRO-seq intensities for the indicated samples

981 around the +1 dyad (defined in Fig. 1F) and boxplots indicate the distance from the +1 dyad to

982 pausing site. Note that only nucleosomes overlapped with H3K4me3 ChIP-seq enrichment

983 (GSM2507874) were assigned to the +1 nucleosome, in an effort to exclude false-positive

984 nucleosomes. No-shift genes upon Ino80p-KD for (C) and not shifted genes in *arp5Δ* for (D)

985 were divided into two groups, namely those exhibiting a pausing site either outside (N = 463 for

986 Ino80p-KD and N = 518 for *arp5Δ*; Left) or inside (N = 401 for Ino80p-KD and N = 603 for

987 *arp5Δ*; Right) of the +1 nucleosome, which allowed us to more clearly distinguish the location of

988 the PRO-seq peak. The two dotted lines represent the position of the +1 nucleosome (75 bp

989 upstream and downstream of the +1 dyad). Asterisks represent statistically significant differences,

990 as calculated using the Wilcoxon test. (E) Overlap between shift-to-5' genes upon Ino80p-KD (N

991 = 160) and genes showing an upstream shift (> 30bp) of RNAPII pausing in *arp5Δ* (N = 264). *P*

992 value was calculated using the hypergeometric distribution.

993 All PRO-seq data were generated using combined biological replicates. PRO-seq and MNase-seq

994 intensities were calculated using either spike-in-normalized reads per million or gaussian

995 smoothing-normalized reads per million, respectively. For average profiles, medians reflect either

996 a 20-bp bin (PRO-seq) or a 10-bp bin (MNase-seq).

997

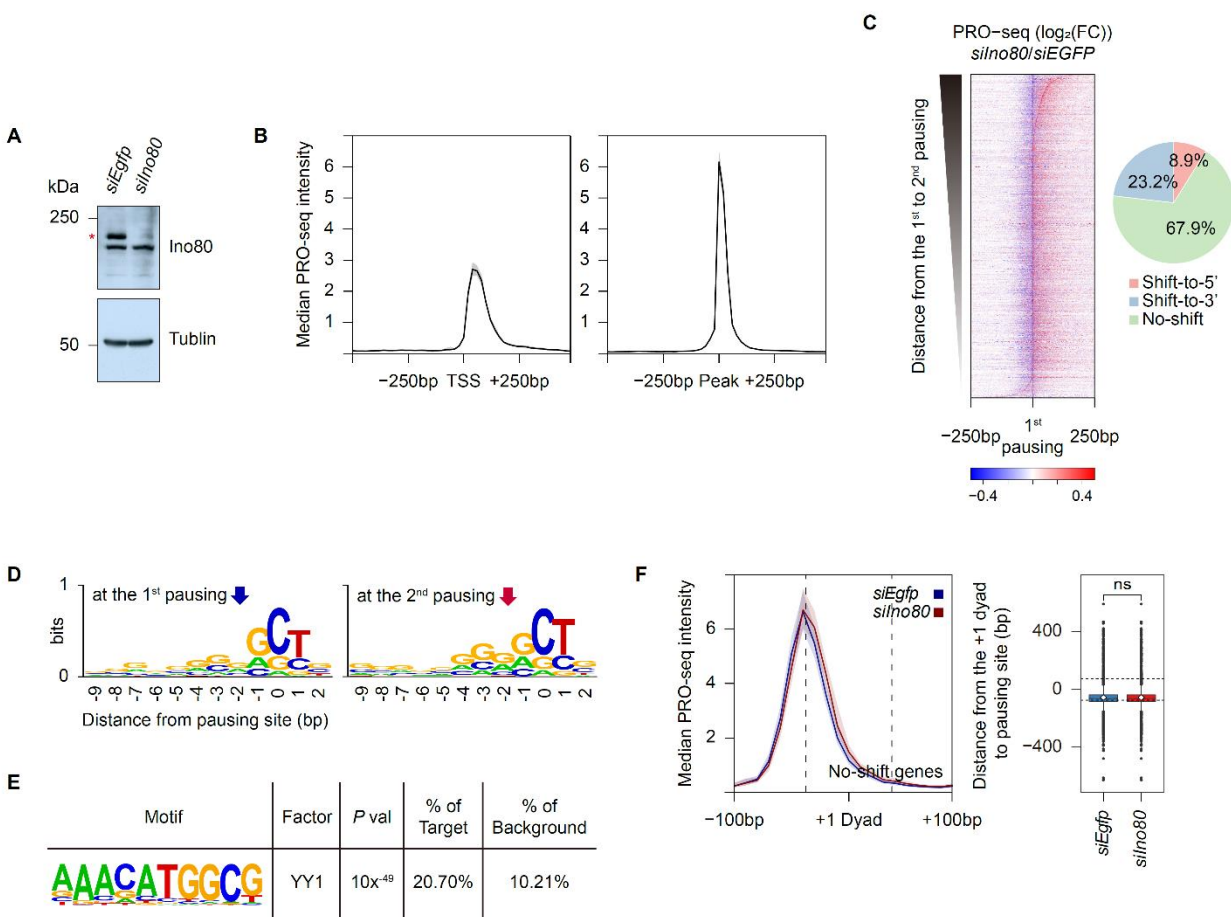

998

999

**fig. S4. Ino80 knockdown yields a conserved defect of RNAPII pausing in mESCs.**

1000 (A) Western blot analysis of whole-cell lysates from mESCs treated with *siEgfp* or *siIno80* for 48

1001 hrs shows that Ino80 was almost completely and specifically degraded in the presence of *siIno80*

1002 (The red asterisk). Tubulin was detected as a loading control. (B) Average profile of median

1003 PRO-seq intensities in mESCs treated with *siEgfp* centered on either the annotated TSS or the

1004 observed PRO-seq peak. (C) Heatmaps representing PRO-seq signals at the 1<sup>st</sup> pausing site in

1005 mESCs treated with *siIno80*, given as a log<sub>2</sub> fold change relative to that in mESCs treated with

1006 *siEgfp*. Genes were sorted by the distance to the 2<sup>nd</sup> pausing site. Pie chart shows the percentage

1007 of genes whose pausing sites are shifted toward 5' (N = 2,206), toward 3' (N = 5,767), or not

1008 shifted (N = 16,903). (D) Sequence logos around either the 1<sup>st</sup> or 2<sup>nd</sup> pausing site were generated

1009 using WebLogo (37). (E) *De novo* Motif analysis using the findMotifsGenome.pl program of  
1010 HOMER (46) found that the YY1 motif was significantly enriched at the promoter regions of  
1011 shift-to-3' genes (N = 2,324) compared to no-shift genes (N = 16,903). The sequences 250bp  
1012 upstream and downstream of the observed PRO-seq peak were used as the promoter regions. (F)  
1013 Average profiles of the median PRO-seq intensity around the +1 dyad, which was determined by  
1014 MNase-seq used in Fig. 5D, for no-shift genes. The two dotted lines represent the positions of the  
1015 +1 nucleosome (75 bp upstream and downstream of the +1 dyad). Note that only nucleosomes  
1016 with H3K4me3 ChIP-seq enrichment (GSM590111) were used, in an effort to exclude false-  
1017 positive nucleosomes (N = 4,564). Boxplot indicates the distance from the +1 dyad to pausing  
1018 site.  
1019 All PRO-seq data were generated using combined biological replicates. PRO-seq intensity was  
1020 calculated in reads per million. For average profiles, medians reflect 20-bp. For heatmaps, the  
1021 signals reflect a 10-bp bin around the indicated site. Asterisks represent statistically significant  
1022 differences, as calculated using the Wilcoxon test.

1023  
1024  
1025  
1026  
1027  
1028  
1029  
1030  
1031  
1032  
1033

| Experiment | Sample <sup>a</sup>      | Total reads | Mapped to rRNA | Uniquely mapped to genome | Spike-in genome | Norm. factor <sup>b</sup> | Spearman correlation (Rho) <sup>c</sup> |             |
|------------|--------------------------|-------------|----------------|---------------------------|-----------------|---------------------------|-----------------------------------------|-------------|
|            |                          |             |                |                           |                 |                           | Promoter proximal <sup>d</sup>          | Whole genes |
| PRO-seq    | SC_Ino80-AID_Ctrl_rep1   | 26142062    | 11900913       | 5501869                   | 322452          | 0.94                      | 0.985                                   | 0.992       |
|            | SC_Ino80-AID_Ctrl_rep2   | 25041456    | 11493690       | 5282796                   | 322219          | 0.94                      |                                         |             |
|            | SC_Ino80-AID_KD_rep1     | 25713790    | 11192062       | 5434019                   | 341750          | 1.00                      | 0.984                                   | 0.990       |
|            | SC_Ino80-AID_KD_rep2     | 22761013    | 10326913       | 4624242                   | 324736          | 0.95                      |                                         |             |
|            | SC_Ino80-AID_Rescue_rep1 | 24015944    | 11196976       | 4997072                   | 253963          | 0.74                      | 0.979                                   | 0.990       |
|            | SC_Ino80-AID_Rescue_rep2 | 28013177    | 13288181       | 5407738                   | 275995          | 0.81                      |                                         |             |
| PRO-cap    | SC_Ino80-AID_Ctrl_rep1   | 29171466    | 2073847        | 17697595                  | 621427          | 0.77                      | 0.995                                   | N/A         |
|            | SC_Ino80-AID_Ctrl_rep2   | 33743267    | 2528625        | 20358414                  | 711586          | 0.88                      |                                         |             |
|            | SC_Ino80-AID_KD_rep1     | 27699506    | 1537081        | 18037675                  | 783854          | 0.96                      | 0.995                                   |             |
|            | SC_Ino80-AID_KD_rep2     | 31144225    | 2322090        | 18014706                  | 808134          | 1.00                      |                                         |             |
| PRO-seq    | SC_wt_rep1               | 25155762    | 8671835        | 6399398                   | 399563          | 1.00                      | 0.987                                   | 0.992       |
|            | SC_wt_rep2               | 26429266    | 10004941       | 6435134                   | 351368          | 0.88                      |                                         |             |
|            | SC_htz1del_rep1          | 24700582    | 10071645       | 5543700                   | 287164          | 0.72                      | 0.985                                   | 0.992       |
|            | SC_htz1del_rep2          | 29874171    | 11196944       | 7006309                   | 355166          | 0.89                      |                                         |             |
|            | SC_arp5del_rep1          | 23312472    | 7394892        | 6670498                   | 394804          | 0.99                      | 0.988                                   | 0.993       |
|            | SC_arp5del_rep2          | 23135952    | 7778575        | 6603702                   | 340276          | 0.85                      |                                         |             |
|            | SC_wt_rep1               | 18220821    | 6492964        | 4474354                   | 301389          | 0.55                      | 0.986                                   | 0.978       |
|            | SC_wt_rep2               | 20853640    | 5327949        | 5544028                   | 543728          | 1.00                      |                                         |             |
|            | SC_spt4del_rep1          | 21261858    | 2758684        | 11162014                  | 321189          | 0.59                      | 0.996                                   | 0.995       |
|            | SC_spt4del_rep2          | 22331041    | 4475130        | 11536938                  | 302405          | 0.56                      |                                         |             |
|            | MM_E14Tg2a_siEgfp_rep1   | 41178443    | 487331         | 21444972                  | N/A             | N/A                       | 0.979                                   | 0.988       |
|            | MM_E14Tg2a_siEgfp_rep2   | 60330200    | 750424         | 33427705                  |                 |                           |                                         |             |

|  |                                  |          |        |          |  |  |       |       |
|--|----------------------------------|----------|--------|----------|--|--|-------|-------|
|  | MM_E14Tg2a_ <i>silno80</i> _rep1 | 60798641 | 732917 | 33253699 |  |  | 0.980 | 0.990 |
|  | MM_E14Tg2a_ <i>silno80</i> _rep2 | 58179420 | 840975 | 34197412 |  |  |       |       |

1034 **table S1. Summary of PRO-seq reads and reproducibility obtained in this study.**

1035 <sup>a</sup> SC indicates *S. cerevisiae* sample and MM indicates mESCs sample. <sup>b</sup> Norm. factor was

1036 calculated by the relative number of reads mapped to a *S. pombe* genome. <sup>c</sup> Reproducibility of

1037 PRO-seq and PRO-cap was calculated by a Spearman's Rho using spike-in-normalized reads per

1038 million at the indicated regions. <sup>d</sup> For *S. cerevisiae*, the regions from the observed TSS to

1039 downstream 250bp (TSS to TSS+250 bp) were used as the promoter-proximal regions. For

1040 mESCs, the regions from 100bp downstream to 200bp upstream of the observed PRO-seq peaks

1041 were used as the promoter-proximal regions.

1042

| # | Yeast strain | Genotype                                                                                                                                                                                                                                    | Reference  |
|---|--------------|---------------------------------------------------------------------------------------------------------------------------------------------------------------------------------------------------------------------------------------------|------------|
| 1 | NF191        | INO80-IAA*-FLAG, genetic background:DF5, paternal strain: U2721, <i>his3-Δ200</i> , <i>leu2-3,2-112</i> , <i>lys2-801</i> , <i>trp1-1(am)</i> , <i>URA3::TIR-9Myc</i> , <i>INO80-44AID9Flag::hphNT</i>                                      | (29)       |
| 2 | SC1242       | <i>spt4Δ</i> INO80-IAA*-FLAG, genetic background:DF5, paternal strain: U2721, <i>his3-Δ200</i> , <i>leu2-3,2-112</i> , <i>lys2-801</i> , <i>trp1-1(am)</i> , <i>URA3::TIR-9Myc</i> , <i>INO80-44AID9Flag::hphNT</i><br><i>spt4Δ::natMX6</i> | This study |
| 3 | SC1163       | <i>paf1Δ</i> INO80-IAA*-FLAG, genetic background:DF5, paternal strain: U2721, <i>his3-Δ200</i> , <i>leu2-3,2-112</i> , <i>lys2-801</i> , <i>trp1-1(am)</i> , <i>URA3::TIR-9Myc</i> , <i>INO80-44AID9Flag::hphNT</i><br><i>paf1Δ::natMX6</i> | This study |
| 4 |              | BY4741, genetic background S288C, paternal strain: BY4741, MATa <i>his3Δ1 leu2Δ0</i><br><i>met15Δ0 ura3Δ0</i>                                                                                                                               |            |
| 5 | SC1086       | <i>arp5Δ</i> , genetic background S288C, paternal strain: BY4741, MATa <i>his3Δ1 leu2Δ0 met15Δ0</i><br><i>ura3Δ0 arp5Δ::kanMX6</i>                                                                                                          | This study |
| 6 | SC1266       | <i>htz1Δ</i> , genetic background S288C, paternal strain: BY4741, MATa <i>his3Δ1 leu2Δ0 met15Δ0</i><br><i>ura3Δ0 htz1Δ::natMX6</i>                                                                                                          | This study |



|   |        |                                                                                                                                                                                                                      |            |
|---|--------|----------------------------------------------------------------------------------------------------------------------------------------------------------------------------------------------------------------------|------------|
| 7 | SC1264 | <i>spt4</i> $\Delta$ , genetic background S288C, paternal strain: BY4741, MATa <i>his3</i> $\Delta$ 1 <i>leu2</i> $\Delta$ 0 <i>met15</i> $\Delta$ 0<br><i>ura3</i> $\Delta$ 0 <i>spt4</i> $\Delta$ :: <i>natMX6</i> | This study |
|---|--------|----------------------------------------------------------------------------------------------------------------------------------------------------------------------------------------------------------------------|------------|

1043

**table S2. List of strains used in this study.**
